1 **TITLE**

2 **Commensal Microbiota Regulates Skin Barrier Function And Repair Via Signaling**  
3 **Through The Aryl Hydrocarbon Receptor**

4  
5 **AUTHORS**

6 Aayushi Uberoi<sup>1</sup>, Casey Bartow-McKenney<sup>1</sup>, Qi Zheng<sup>1</sup>, Laurice Flowers<sup>1</sup>, Amy Campbell<sup>1</sup>,  
7 Simon A.B. Knight<sup>1</sup>, Neal Chan<sup>1</sup>, Monica Wei<sup>1</sup>, Victoria Lovins<sup>1</sup>, Julia Bugayev<sup>1</sup>, Joseph  
8 Horwinski<sup>1</sup>, Charles Bradley<sup>1</sup>, Jason Meyer<sup>2</sup>, Debra Crumrine<sup>2</sup>, Carrie Hayes Sutter<sup>3</sup>, Peter  
9 Elias<sup>2</sup>, Elizabeth Mauldin<sup>1</sup>, Thomas R. Sutter<sup>3\*</sup>, Elizabeth A. Grice<sup>1\*</sup>

10

11 **AFFILIATIONS**

12 <sup>1</sup>University of Pennsylvania, Perelman School of Medicine, Department of Dermatology,  
13 Philadelphia, Pennsylvania, USA.

14 <sup>2</sup>San Francisco Veterans Affairs Medical Center, Dermatology Service and University of  
15 California San Francisco; Department of Dermatology, San Francisco, California

16 <sup>3</sup> Department of Biological Sciences; W. Harry Feinstone Center for Genomic Research,  
17 University of Memphis, Memphis, Tennessee, USA.

18

19 **CONTACT INFORMATION**

20 \*Address for correspondence:

21 [egrice@pennmedicine.upenn.edu](mailto:egrice@pennmedicine.upenn.edu)

22 [tsutter@memphis.edu](mailto:tsutter@memphis.edu)

23 **SUMMARY**

24 The epidermis forms a barrier that defends the body from desiccation and entry of harmful  
25 substances, while sensing and integrating environmental signals. The tightly orchestrated  
26 cellular changes required for the proper formation and maintenance of this epidermal barrier  
27 occur in the context of the skin microbiome. Using germ free mice, we demonstrate the  
28 microbiota is necessary for proper differentiation and repair of the epidermal barrier. These  
29 effects were mediated by the aryl hydrocarbon receptor (AHR) in keratinocytes, a xenobiotic  
30 receptor also implicated in epidermal differentiation. Murine skin lacking keratinocyte AHR was  
31 more susceptible to barrier damage and infection, during steady state and epicutaneous  
32 sensitization. Colonization with a defined consortium of human skin isolates restored barrier  
33 competence in an AHR-dependent manner. We reveal a fundamental mechanism whereby the  
34 microbiota regulates skin barrier formation and repair, with far-reaching implications for the  
35 numerous skin disorders characterized by epidermal barrier dysfunction.

36

37 **KEYWORDS**

38 Skin; barrier; microbiome; epidermis; aryl hydrocarbon receptor; keratinocyte; microbiota;  
39 commensal

40 **MAIN TEXT**

41 **INTRODUCTION**

42           The skin is the primary barrier between the human body and the environment and  
43 functions to prevent desiccation and entry of foreign and/or harmful substances. The barrier  
44 properties of the skin reside in the epidermis, a semi-permeable stratified epithelium that is  
45 formed as a result of keratinocyte terminal differentiation. Though continuously exposed to  
46 xenobiotic toxins, physical insults, and pathogenic microbes, the epidermis is also associated  
47 with diverse commensal microbial communities that are critical players in regulating skin  
48 physiology [1]. These microbial communities, collectively referred to as skin microbiota, are  
49 specialized to thrive in the unique nutrient and environmental conditions of this organ. The skin  
50 microbiome is topographically diverse, temporally complex, and distinct from other organs [2, 3].  
51 How the commensal microbiota influences development of skin's barrier function is undefined,  
52 as are the molecular mechanisms that mediate these interactions.

53           The barrier function of the skin may be conceptualized as four intertwined "levels"  
54 consisting of microbial, immune, chemical, and physical barriers [4]. The skin microbiome itself  
55 provides a barrier to pathogenic micro-organisms via a variety of different mechanisms e.g.  
56 production of proteases, antimicrobial peptides and antibiotics, and interference with quorum  
57 sensing [5]. This outermost microbial barrier also interacts with and mediates other functional  
58 levels of the cutaneous barrier. Skin microbiota play a fundamental role in the induction,  
59 training, and function of the skin immune barrier in part through the release of antimicrobial  
60 peptides, short-chain fatty acids, and polyamines [6]. Neonatal colonization by microbiota has  
61 long-lasting impacts on adult immune barrier as commensal skin microbes' prime immune cells  
62 to differentiate between commensal versus pathogenic bacterium [7]. Bacterial lipases can  
63 hydrolyze lipids resulting in production of free fatty acids that impact the acidic surface pH of the  
64 skin, which dictates the chemical barrier of the skin [8, 9]. While studies in gnotobiotic mice  
65 suggest that epidermal differentiation and barrier genes are microbially regulated [10],

66 mechanistic roles for the skin microbiota in development, regeneration, and function of the  
67 physical barrier are not well defined.

68         The epidermal permeability barrier (EPB) comprises of the stratum corneum and a  
69 complex system of tight junctions and adhesion complexes and their associated cytoskeletal  
70 networks that mediate cell-cell adhesion to create a mechanical barrier between the  
71 environment and underlying tissue [11]. Actively dividing keratinocytes in the stratum basale  
72 commit to terminal differentiation and move progressively into suprabasal layers, i.e. stratum  
73 spinosum, the stratum granulosum and eventually the stratum corneum [12]. In the stratum  
74 corneum, keratinocytes become flattened and denucleated (which are then called corneocytes),  
75 and plasma membranes are replaced with cornified envelopes. Lamellar bodies secrete their  
76 lipid-rich contents into the intercellular space between the corneocytes and are subsequently  
77 processed into barrier-providing lipid lamellae. Altogether, corneocytes, lipids and a complex  
78 network of trans-membrane proteins, provide a highly hydrophobic EPB against the  
79 environment. Microbial influences on this process of epidermal differentiation and EPB  
80 formation are not well understood, nor are the mechanisms whereby the EPB senses and  
81 responds to changes in the microbiota.

82         The sensing of xenobiotics, or compounds foreign to a living organism, is critical for  
83 barrier defense and homeostasis in the skin [13]. Keratinocytes function as sentinels that sense  
84 and respond to external stimuli [14]. Activation of xenobiotic receptors in keratinocytes induces  
85 expression of detoxification enzymes and membrane transporters that promote elimination of  
86 toxic compounds[15]. Accumulating evidence suggests that roles for xenobiotic receptors  
87 extend to cellular processes beyond xenobiotic metabolism that include cellular proliferation,  
88 tissue repair, and immune responses [13]. Microbes produce a plethora of small molecules and  
89 secondary metabolites, which are hypothesized to mediate their interactions with the host  
90 toward a mutualistic relationship [16]. The diversity of molecular signals produced by skin  
91 microbes, and how keratinocytes decipher and respond to them, remain largely unexplored.

92           The aryl hydrocarbon receptor (AHR) is a xenobiotic receptor that has emerged as a  
93 critical player in EPB development, function and integrity. Activation of the AHR, a ligand-  
94 activated transcription factor of the basic, helix-loop-helix motif-containing Per-ARNT-Sim family  
95 [17], induces a variety of epidermal differentiation and barrier genes, accelerates terminal  
96 differentiation, and increases stratum corneum thickness [18-22]. The AHR can be activated by  
97 halogenated and non-halogenated aromatic hydrocarbons, including dioxins such as 2,3,7,8-  
98 Tetrachlorodibenzo-p-dioxin (TCDD), polychlorinated biphenyls (PCBs) and polycyclic aromatic  
99 hydrocarbons (PAHs); clinically used drugs, food-derived molecules, endobiotics, and bacterial  
100 metabolites [23-26]. Microbial regulation of the AHR in the context of the skin barrier remains  
101 poorly understood, as well as the consequences of perturbing the commensal microbiota with  
102 respect to EPB function and defense.

103           In addition to congenital barrier deficiencies, epidermal barrier dysfunction is a hallmark  
104 of inflammatory skin diseases, including atopic dermatitis and psoriasis, and predisposes skin to  
105 infections [27-29]. Additionally, epicutaneous sensitization, as a result of epidermal barrier  
106 dysfunction, may lead to atopic and allergic disease [30]. Thus, there is an urgent scientific and  
107 clinical need to define the mechanistic basis by which the commensal microbiota regulate  
108 homeostatic barrier function, as such mechanisms provide new targets for prevention and/or  
109 intervention in skin barrier deficiencies.

110           Here, we investigated the role of commensal microbiota in regulation of permeability  
111 barrier homeostasis of skin. We found that commensal microbes are necessary for normal  
112 epidermal differentiation, EPB function, and repair. These effects were mediated by microbial  
113 signaling through the keratinocyte AHR. Murine skin lacking keratinocyte AHR signaling  
114 displayed increased barrier permeability, enhanced susceptibility to infection by *S. aureus*, and  
115 increased pathology in a model of atopic dermatitis. We show that topical colonization with a  
116 defined consortium of human skin commensals improves EPB function in murine germ-free skin  
117 and models of barrier dysfunction. Our findings reveal a fundamental role for the commensal

118 skin microbiota in regulating the physical integrity and repair of the skin barrier, provides  
119 mechanistic insights into microbial-skin crosstalk, and uncovers therapeutic targets for  
120 improving skin barrier function.

## 121 **RESULTS**

### 122 **Epithelial development and differentiation programs are impaired in germ free skin**

123 To characterize microbially-mediated regulation of homeostatic epithelial gene  
124 expression programs, we performed RNA-seq on epidermal sheets isolated from dorsal skin of  
125 *C57BL/6* mice of 3 different colonization states (n=8 mice each. **Figure 1A**): Specific pathogen  
126 free (SPF) mice that were conventionally raised in presence of microbiota, germ free (GF) mice  
127 born and raised in sterile gnotobiotic isolators, and a third group of mice that were born GF and  
128 then colonized (COL) with SPF microbiota for 2 weeks. Within 2 weeks, COL mice were  
129 colonized with microbiota from SPF mice as validated by 16S ribosomal RNA (rRNA) gene  
130 sequencing (**Figure 1B**). We identified differentially expressed genes (DEGs) between  
131 colonization states by training negative-binomial linear models using DESeq2 R package and 3-  
132 way comparisons. This analysis revealed 6396, 427, and 3232 DEGs for SPF vs. GF, COL vs.  
133 GF and SPF vs. COL comparisons, respectively (**Figure 1C, Table S1**). We focused on the 396  
134 shared DEGs of SPF and COL epidermis when compared to GF epidermis (**Figure 1D**). We  
135 reasoned that this subset of DEGs meet the criteria of being induced and sustained by microbial  
136 colonization, suggesting homeostatic control. The 396 DEGs were significantly enriched for  
137 biological functions such as skin development, keratinocyte differentiation, and epidermis  
138 development (**Figure 1E**). This result suggests the microbiota plays an important role in  
139 epithelial barrier formation.

140 To further examine DEGs involved in epithelial barrier function, we manually curated  
141 genes involved in different facets of epithelial barrier: keratinization, cornified envelope  
142 formation, adherence and gap junction, basement membrane function, barrier development,  
143 differentiation and intercellular lipid-lamellae processing (**Table S2**). Focusing on the SPF vs.

144 GF subset of DEGs, multiple genes across each of these categories were expressed at lower  
145 levels in GF mice (**Figure 1F, Tables S3, S4**). In particular, genes critical for cornified envelope  
146 formation [e.g. *involucrin (Ivl)*, *envoplakin (Evpl)*] and its desquamation, [e.g. *Kallikrein-related*  
147 *peptidases 5, 7 (Klk5, 7)*] were downregulated in GF skin. We hypothesized that such significant  
148 and widespread differences in gene expression would result in structural differences between  
149 GF and SPF skin. However, consistent with prior reports [10, 31] we did not notice any overt  
150 differences between the epithelial organization of GF vs SPF mice by traditional  
151 histopathological examination (**Figure S1**). Analysis of skin ultrastructure by electron  
152 microscopy showed that overall, SPF mice had a greater number of individual layers within the  
153 stratum corneum than GF mice (**Figure S1**). Immunofluorescence-based analysis of molecular  
154 biomarkers showed decreased expression of loricrin and cytokeratin-10 in skin of GF mice  
155 (**Figure 1G**) that are implicated in barrier integrity [32-34]. Among genes that were  
156 downregulated in GF skin were tight and adherens junctions family members (**Figure 1F**) such  
157 as *tight junction protein 3 (Tjp3)*, *desmogleins 1a-b (Dsg1)*, and *claudin-1 (Cldn1)* that are  
158 critical players involved in skin barrier formation (reviewed in [35]). Remarkably, tight junction  
159 integrity appeared compromised in the suprabasal epithelium as evident by downregulated and  
160 diffused expression of *Dsg1* in GF mouse epidermis (**Figure 1G**). Disruption of *Dsg1* is  
161 associated with improper formation of desmosomes in suprabasal epithelia and has been  
162 associated with skin barrier impairment [36-38]. Together, these findings suggest the  
163 hypothesis that skin barrier formation requires the commensal microbiota.

#### 164 **Commensal microbiota promotes skin barrier function and repair**

165 A fully functioning stratum corneum closely controls the water concentration gradient in  
166 the skin such that passive diffusion of water occurs from inner layers towards the outside.  
167 Barrier disruption compromises the ability of the stratum corneum to maintain this water  
168 concentration gradient and results in increased transepidermal water loss (TEWL), measured  
169 using a sensor for water vapor flow density [39, 40]. Low TEWL values are indicative of intact

170 skin and increased TEWL is associated with a disrupted barrier (**Figure 2A, Panel i**). Under  
171 basal conditions, GF mice had slightly increased TEWL compared to SPF mice corroborating  
172 the findings from ultrastructure analysis (**Figure S2**). Skin barrier of GF mice was perturbed  
173 more readily with tape stripping than SPF skin (**Figure S2**), consistent with fewer layers of  
174 stratum corneum in GF mice. After comparable insults following tape-strip injury (TEWL 15-20  
175 g/m<sup>2</sup>/h), SPF mice more rapidly repaired their barrier compared to GF mice when measured  
176 over a period of 24 hours (**Figure 2B**). We observed similar delays in barrier recovery in GF  
177 *Rag1*<sup>-/-</sup> mice (that lack mature T and B-cells) compared to age-matched SPF *Rag1*<sup>-/-</sup> mice  
178 (**Figure 2C, Figure S2**) suggesting that microbially-regulated adaptive immune responses are  
179 not responsible for the delayed barrier repair phenotype. Skin from GF *Rag1*<sup>-/-</sup> mice also  
180 showed decreased expression of genes involved in terminal differentiation and formation of  
181 transmembrane junctions compared to SPF *Rag1*<sup>-/-</sup> mice (**Figure S2**) as seen in wild-type mice.

182 Basal keratinocytes undergo a spatiotemporal and highly controlled differentiation  
183 program dependent on intracellular calcium flux to establish and maintain barrier [41]. In  
184 presence of high calcium, primary epidermal keratinocytes can differentiate *in vitro* to express  
185 genes involved in formation of cornified envelope [42]. We derived murine primary epidermal  
186 keratinocytes from GF and SPF skin, respectively, and exposed them to high calcium containing  
187 medium (**Figure 2D**). Expression of genes involved in terminal differentiation [*cytokeratin-10*  
188 (*Krt10*), *involucrin (Ivl)*] and formation of transmembrane junctions [*Corneodesmosin (Cdsn)*,  
189 *Desmocollin-1(Dsc1)*, *Desmoglein-1a (Dsg1a)*] were reduced in GF keratinocytes compared to  
190 SPF keratinocytes (**Figure 2E, Figure S2**). Additionally, GF keratinocytes had decreased  
191 transepithelial electrical resistance (TEER) which is indicative of decreased transmembrane  
192 junction strength (**Figure 2F, Figure S2**).

193 To further examine the implications of perturbing the microbiota on skin barrier function  
194 we used an antibiotic depletion model (**Figure 2G**). Prior studies had shown that antibiotics  
195 traditionally used to disrupt gut microbiota in mice were not sufficient to disrupt skin microbiota



196 in mice [43]. We developed a new regimen consisting of antibiotics (Metronidazole,  
197 Sulfamethoxazole, Trimethoprim, Cephalexin and Enrofloxacin) that are administered orally in  
198 hospitals and veterinary clinics to target skin bacteria [44-47] and were able to inhibit prominent  
199 murine skin commensal *Staphylococcus xylosus* [48, 49]. Oral administration of antibiotics for  
200 two weeks diminished microbial burden on skin as observed by both quantitative cultures and  
201 16S rRNA gene sequencing (**Figure 2H, I**) but did not significantly affect microbial burden in the  
202 gut (**Figure S3**). Antibiotic-treated mice were delayed in barrier repair compared to control mice  
203 that were treated with vehicle (**Figure 2J**). Together, these data confirm a role for commensal  
204 microbes in promoting skin barrier function and repair.

### 205 **Aryl hydrocarbon receptor pathway is attenuated in germ free skin**

206 The sensing of external physiological and chemical signals is critical for barrier defense  
207 and homeostasis in the skin [13]. Therefore, we hypothesized that xenobiotic receptors that act  
208 as epithelial sensors and relay microbial signals would be among those genetic pathways  
209 dysregulated in GF epidermis. Previous studies have identified at least 304 xenobiotic  
210 processing genes (XPGs) in mice, which encode the enzymes, transporters, and transcription  
211 factors required to metabolize xenobiotics [50]. We found that 52/304 XPGs were differentially  
212 expressed ( $P < 0.05$ ) in skin of SPF and GF mice, and the majority were upregulated in SPF  
213 mice ( $n=43/52$ ; **Table S5**). The pregnane X receptor (PXR, *NR1I2*), constitutive androstane  
214 receptor (CAR, *NR1I3*), peroxisome proliferator-activated receptor-alpha (PPAR $\alpha$ ) and aryl  
215 hydrocarbon receptor (AHR) are key transcription factors that regulate xenobiotic processing in  
216 skin [51]. Of these, only the AHR gene was differentially expressed and was upregulated in SPF  
217 skin compared to GF skin. Canonically, after ligand binding, the AHR translocates to the cell  
218 nucleus and binds DNA at xenobiotic responsive elements (XRE), to regulate transcription of  
219 target genes [52]. Expression of key downstream target genes, i.e. cytochrome-p450 *Cyp1a1*  
220 and molecular chaperones *Hsp90aa1* and *Hsp90ab1* that respond to AHR activation, were also  
221 downregulated in GF murine epidermis (**Figure 3A**). Primary keratinocytes derived from GF skin

222 were also impaired in expression of these genes (**Figure S2**). Overall, microbiota-mediated  
223 upregulation of *AHR* was consistent with changes in its canonical pathway, suggesting that  
224 regulation of xenobiotic processing genes in the skin may be mediated through the *AHR*.

225         Since the AHR can activate multiple signaling pathways [53], we explored the impact of  
226 microbial colonization on expression of genes reported to be a part of canonical and non-  
227 canonical AHR signaling networks (**Figure 3A**). In this context, we saw upregulation of several  
228 genes in SPF mice, including those involved in cell proliferation, differentiation, and  
229 inflammation (e.g. *Hes1*, *Jun* and *Tgfb1*). Together these findings suggest the AHR as a  
230 potential mechanism by which skin microbes modulate epithelial barrier integrity.

### 231 **Treatment with an AHR agonist improves barrier function and recovery in germ free mice**

232         We hypothesized that if the GF skin barrier phenotype we observed was due to  
233 attenuated AHR signaling, then activation via AHR ligand would improve barrier recovery. We  
234 treated adult GF mice topically with AHR ligand 6-Formylindolo[3,2-b] carbazole (FICZ), daily for  
235 2 weeks at a low dose (100µg/kg) (**Figure 3B**), a regimen shown to induce expression of  
236 *Cyp1a1* [54]. FICZ is a tryptophan photoproduct and is a well-characterized AHR ligand in skin  
237 [55, 56]. At the end of treatment, we compared the rate of barrier recovery in tape-stripped GF  
238 mice that were either treated with FICZ or vehicle (**Figure 3C**). We observed that FICZ  
239 significantly accelerated barrier recovery in GF mice. In parallel, we also treated SPF mice with  
240 FICZ at the same dose and observed that FICZ accelerated early stage barrier recovery  
241 (**Figure 3D**). FICZ treatment activated AHR signaling in the treated group as *CYP1A1*  
242 expression was induced in all FICZ treated mice in comparison to the untreated group (**Figure**  
243 **3E**). Additionally, FICZ treatment increased expression of genes implicated in barrier repair  
244 (**Figure 3E**) in GF mice. AHR upregulation increases expression of genes involved in epidermal  
245 differentiation and formation of gap junctions [57]. In primary human keratinocytes, FICZ  
246 increased epithelial resistance as measured by TEER (**Figure 3F, Figure S4**), which was  
247 diminished by co-treatment with an AHR inhibitor (**Figure 3G**). Overall, activation of the AHR in

248 GF skin improves epidermal barrier recovery, supporting a mechanistic role for the commensal  
249 microbiota in homeostatic regulation of the AHR.

250 **Mice deficient in epithelial AHR have a defective skin barrier and are more susceptible to**  
251 **infection**

252 AHR is expressed in a variety of cell types in the skin, but abrogating AHR function in  
253 keratinocytes has been suggested to impact skin barrier [58]. To confirm the role of keratinocyte  
254 AHR in skin barrier function, we generated mice where the *floxed Ahr* allele (*Ahr<sup>ff</sup>*) was  
255 conditionally knocked out in the skin epithelia using a *Cre* driven by the keratin-14 promoter  
256 (*K14<sup>Cre/+</sup>Ahr<sup>ff</sup>*). While littermates that retained AHR function (*Ahr<sup>ff</sup>*) repaired their barrier within  
257 24 hours following tape-strip disruption, barrier repair was significantly diminished in  
258 *K14<sup>Cre/+</sup>Ahr<sup>ff</sup>* skin (**Figure 4A**). Additionally, keratinocytes derived from *K14<sup>Cre/+</sup>Ahr<sup>ff</sup>* mice  
259 showed increased TEER compared to *Ahr<sup>ff</sup>* keratinocytes (**Figure 4B**).

260 Patients with diseases of skin barrier impairment such as atopic dermatitis (AD) are  
261 highly susceptible to colonization and infection by pathogens including *S. aureus* [59]. To test if  
262 AHR-dependent barrier impairment leads to increased infection, we topically applied *S. aureus*  
263 to tape-stripped skin [60] and quantified bacteria following 48 hours. We observed enhanced  
264 infection of *S. aureus* and increased overall bacterial burden on tape stripped skin (**Figure 4C**)  
265 of *K14<sup>Cre/+</sup>Ahr<sup>ff</sup>* mice compared to AHR sufficient controls (**Figure 4D**). Since barrier dysfunction  
266 is a hallmark in the development of AD [61], and mice lacking AHR are impaired in barrier  
267 repair, we hypothesized that these mice will be more prone to barrier damage, infection, and  
268 atopic disease. We adapted a mouse model of AD (**Figure 4E**) induced by repeated  
269 epicutaneous sensitization of tape-stripped skin with ovalbumin (OVA) [30]. In this model,  
270 *K14<sup>Cre/+</sup>Ahr<sup>ff</sup>* skin was exacerbated in disease pathology, with enhanced TEWL (**Figure 4F**) and  
271 increased susceptibility to *S. aureus* infection compared to *Ahr<sup>ff</sup>* mice (**Figure 4G**). Together,  
272 these data demonstrate that AHR function in keratinocytes is essential for barrier function, and

273 loss of AHR can lead to enhanced barrier damage in the setting of inflammatory skin disease  
274 and facilitate bacterial entry.

### 275 **Human skin microbial consortium restores barrier repair and function via the AHR**

276 In the gastrointestinal tract, the AHR is activated by the gut microbiota [62] to enhance  
277 intestinal barrier integrity by inducing tight junction proteins in intestinal epithelial cells [63].  
278 However, the relation between skin commensals and cutaneous AHR-dependent barrier  
279 regulation is unexplored. Given our observations that the commensal microbiota directly impacts  
280 barrier repair (**Figure 1, 2**) and regulates the AHR genetic pathway (**Figure 3**) in murine skin,  
281 we hypothesized that topical association of GF skin with human skin commensals would  
282 activate the AHR and restore skin barrier repair. To test this hypothesis, we first curated a  
283 collection of cultured skin microbes that were abundant and prevalent on healthy human skin.  
284 Referred to as Flowers' Flora, the collection consists of members of Firmicutes phylum i.e.  
285 *Staphylococcus epidermidis*, *S. warneri*, *S. hemolyticus* and members of Actinobacteria phylum  
286 i.e. *Micrococcus luteus*, *Corynebacterium aurimucosum* (**Figure 5A**). These skin microbes  
287 activated AHR in keratinocytes as determined by way of a reporter assay consisting of the AHR  
288 reporter element conjugated with *Cyp1a1* (**Figure 5B**). Flowers' Flora colonized murine GF skin  
289 as determined by bacterial culture swabs and species-specific qPCR analysis (**Figure 5C, D**).  
290 After two weeks of colonizing with this defined consortium of human skin commensals (**Figure**  
291 **5E**) barrier recovery function in GF skin was restored (**Figure 5F**). Skin of colonized mice  
292 showed elevated expression of differentiation genes as well as *Cyp1a1* (**Figure 5G**) compared  
293 to GF skin. Upon terminal differentiation, keratinocytes derived from colonized mice were  
294 enhanced in TEER compared to GF controls (**Figure 5H**). Colonization of *K14<sup>Cre/+</sup>Ahr<sup>ff</sup>* mice  
295 with Flowers' Flora did not improve barrier repair (**Figure 5I**), further supporting an AHR-  
296 dependent mechanism. Finally, to determine if Flowers' Flora could prevent barrier damage in  
297 AD-like disease, we pre-colonized wild-type SPF murine skin prior to short-term epicutaneous  
298 sensitization with OVA (**Figure 5J**). Pre-colonization with Flowers' Flora significantly improved

299 barrier recovery compared to skin that was not pre-colonized (**Figure 5K**). Together, these  
300 findings indicate that skin commensal microbes signal through the AHR to maintain homeostatic  
301 control of epidermal barrier integrity, and suggest new targets for preventing and/or treating  
302 epidermal barrier dysfunction.

### 303 **DISCUSSION**

304 The skin microbiome provides the first level of barrier defense to the human body. While  
305 commensal skin microbes have demonstrated effects on immune and chemical barriers of the  
306 skin, their regulation of the physical barrier is not well-defined. Proper epithelial differentiation  
307 and cornification is essential for formation of the epithelial barrier [11, 64, 65]. By using  
308 comparative transcriptomics of gnotobiotic mice, we identified genes involved in skin  
309 development, differentiation and barrier function as top candidates for microbial regulation.  
310 Using multiple models of microbial depletion, loss of commensal microbiota impaired the barrier  
311 repair function of the skin. We mechanistically linked the xenobiotic receptor AHR in mediating  
312 microbial signals to the keratinocyte to boost epithelial differentiation and adhesion, and thus  
313 integrity of the EPB. The absence of such signaling resulted in exacerbated pathology and  
314 increased bacterial infection in models of barrier disruption and epicutaneous sensitization.  
315 Finally, we showed that topical association with a consortium of human skin commensals  
316 restores skin barrier function and integrity, an effect that was dependent on the keratinocyte  
317 AHR.

318 Our findings parallel those in the gastrointestinal tract, where gut commensals have  
319 been demonstrated to regulate intestinal barrier formation by modulating epithelial turnover [66]  
320 and controlling mucus production [67]. However, unlike the simple mucosal epithelium that  
321 provides the intestinal barrier, the skin is composed of a multi-layered stratified squamous  
322 epithelium that terminally differentiates. Such complexity requires tightly orchestrated signals to  
323 balance differentiation with proliferation. We show here that skin commensals produce signals  
324 that directly regulate epithelial stratification through the xenobiotic sensor AHR. Future studies

325 will be required to address the identity of the microbial metabolites that interact spatially within  
326 the complex architecture of the skin.

327 Our studies focused on the keratinocyte AHR and its role in forming the EPB, but the  
328 AHR can also be expressed by epidermal Langerhans cells, innate and adaptive immune cells,  
329 and dermal cells. Previous studies suggest that repair of the EPB is not dependent on AHR  
330 derived from Langerhans cells [58]. However, during epicutaneous sensitization, Langerhans  
331 specific loss of AHR led to decreased Langerhans cells number and function and dysregulated  
332 T cell responses [68]. Thus, AHR likely represents a sensor for Langerhans cell activation as  
333 part of the immunological barrier. Further studies will need to better define the cell-type  
334 specificity of AHR signaling to the different levels of barrier function, including the immune  
335 barrier.

336 Through depletion models and topical association with defined microbial consortia, we  
337 demonstrate the necessity and sufficiency, respectively, of commensal microbes in epithelial  
338 barrier function. We note that while colonization of germ-free mice with commensal microbes for  
339 two-weeks (COL) resulted in restoration of key epithelial differentiation signals, there were still  
340 differences between gene expression profiles of COL mice and SPF mice raised in the  
341 presence of microbes. It has been shown that skin-resident immune cells rely on imprinting by  
342 early life bacterial exposures to regulate acute wound healing in adult mouse skin [69].  
343 Therefore, it is possible that certain skin development genes rely on early-life exposure to the  
344 microbiota for complete restoration of epithelial gene expression profiles.

345 Our data supports the hypothesis that sensing of microbial signals by the xenobiotic  
346 receptor AHR are crucial for self-renewal required of the epidermis. Topical application of coal  
347 tar is one of the oldest therapies for atopic dermatitis and has been shown to activate AHR to  
348 induce epithelial differentiation [70]. Recently, the natural product derived small molecule,  
349 Tapinarof, was found to bind and activate the AHR to moderate inflammatory responses in  
350 atopic dermatitis and psoriasis [71]. In support of the hypothesis that AHR mediates microbial

351 signals to promote barrier function, we found that treatment with the potent and selective AHR  
352 ligand FICZ at a low dose was able to restore epithelial barrier repair in GF mice and induced  
353 epithelial differentiation. However, the role of AHR in skin barrier regulation may be highly  
354 context dependent. In murine models, exposure to pollutants can lead to hyperactivation of AHR  
355 that results in skin barrier damage and inflammation, which mirrors the phenotype of mice that  
356 constitutively express AHR in the keratinocyte [72, 73]. Thus, the balance in the specificity and  
357 quantity of AHR ligand, from endogenous and environment sources, is likely a key factor in  
358 modulating downstream signaling and impact on the skin, and requires further investigation.

359 AHR has now been recognized as an intracellular pattern recognition receptor that can  
360 identify and metabolize bacterial pigmented virulence factors, and promote antibacterial defense  
361 responses [74]. Our studies show that loss of AHR in skin led to increased susceptibility to the  
362 skin pathogen *S. aureus*. It remains to be determined whether increased susceptibility was due  
363 to impaired physical barrier, impaired antimicrobial barrier, or both. For example, the microbiota-  
364 induced antimicrobial protein RELM $\alpha$  protects against skin infection in a Vitamin A dependent  
365 manner [75]. Since there is interaction between AHR and retinoic acid signaling pathways [76,  
366 77], this may represent a mechanism by which the skin microbiota mediates the antimicrobial  
367 barrier. The differential roles for pathogens and commensals in regulating AHR and promoting  
368 downstream effects are undefined, though are critical when considering diseases of barrier  
369 impairment or wounding, which are often complicated by *S. aureus* colonization and/or infection.

370 In summary, our findings show a role for skin microbiota in regulating epithelial  
371 differentiation and barrier function in stratified epithelia through AHR. These studies show that  
372 skin microbiome directly impacts development of the epidermal physical barrier. Future studies  
373 that address how microbial communities interact with each other to influence xenobiotic signals  
374 in homeostatic versus disease states will help leverage how personalized microbiota-based  
375 therapies can be used to improve the skin barrier.

376 **FIGURE LEGENDS**

377 **Figure 1. Commensal microbiota regulates epithelial barrier genes. (A)** Three  
378 groups of mice were employed, specific pathogen free (SPF), germ free (GF), and germ-free  
379 mice colonized (COL) with SPF microbiota for 2 weeks. **(B)** Skin microbiota composition  
380 determined by 16S rRNA gene sequencing. Y-axis indicates absolute read counts of most  
381 abundant phylum (by relative abundance in the dataset) for each mouse (x-axis). **(C)** RNA-seq  
382 workflow. **(D)** Overlap of differentially expressed genes when comparing groups of gnotobiotic  
383 mice. **(E)** Shown in white are the number of genes that were further analyzed for uniquely  
384 enriched gene ontology biological process terms for aforementioned DEGs. Shown on the y-  
385 axis are the uniquely enriched terms, with *p*-values indicated on the x-axis. *P*-values are based  
386 on Fisher's exact test and FDR-adjusted under dependency using the "BY" method. **(F)** To  
387 examine DEGs involved in epithelial barrier function, we manually curated genes involved in  
388 different facets of epithelial barrier: keratinization, cornified envelope formation, adherence and  
389 gap junction, basement membrane function, barrier development, differentiation and intercellular  
390 lipid-lamellae processing. Shown here is a snapshot of key genes that were differentially  
391 expressed in the SPF vs GF subset ( $p < 0.001$ ). Horizontal bars represent the Log2 fold-change  
392 comparison (genes upregulated in SPF:  $\log_2FC > 0$ , downregulated in SPF:  $\log_2FC < 0$ ).  
393 Error bars represent standard error estimate for the log2 fold-change computed using the  
394 DESeq2 package. **(G)** Tail-skin from SPF and GF mice. Immunofluorescence-based detection  
395 of differentiation markers (i) loricrin (red) and (ii) keratin-10 (purple) and adhesion marker (iii)  
396 desmoglein-1(grey). Nuclei are counter-stained with Hoechst stain (blue). Images were taken at  
397 constant light exposure (100ms for proteins of interest and 10ms for DAPI channel) and then  
398 overlaid for representation. White dashed-line indicates boundary separating epithelial-stromal  
399 compartments. Scale bar (10 $\mu$ m) is indicated in white (bottom-right). For quantification 10-12  
400 random images were taken in a blinded fashion for each mouse tissue (n=6) at constant light  
401 exposure and processed through ImageJ. For each image integrated density of signal was  
402 normalized to Hoechst stain signal from the same area. Each dot corresponds to average



403 normalized signal across 10-12 images for each mouse. Asterisk indicates statistical  
404 significance ( $p < 0.05$ , T test, two-sided). See also Table S1, S2, S3, S4 and Figure S1.  
405 **Figure 2. Commensal microbiota promotes skin barrier repair function. (A)** Schematic  
406 depicts (i) principle of measuring transepidermal water loss (TEWL) to assess barrier repair  
407 function in adult mice (6-8 weeks old). (ii) Experimental design for assessing barrier recovery.  
408 Dorsal skin of mice was tape-stripped to achieve comparable insults and TEWL was measured  
409 up to 24 hours post-tape stripping. Effect of colonization of microbes was assessed by  
410 comparing age-matched germ-free (GF) and specific pathogen-free (SPF) mice ( $n=4$  mice per  
411 group) in **(B)** wild-type C57/BL6 mice [ANCOVA,  $F(1,69) = 50.649$ ,  $***P < 0.001$ ] and **(C)** *Rag1*<sup>-/-</sup>  
412 mice [ANCOVA,  $F(1,53) = 188.1$ ,  $***P < 0.001$ ]. **(D)** Primary mouse keratinocytes were derived  
413 wild-type GF ( $n=4$ ) and SPF ( $n=4$ ) C57/BL6 mice and grown in 5% FBS and 1.6mM Ca<sup>2+</sup> for  
414 three days to induce terminal differentiation. **(E)** Expression of genes involved in differentiation  
415 [Involucrin (*Ivl*), cytokeratin-10 (*Krt10*)] and adherence [Corneodesmosin (*Cdsn*), Desmocollin-1  
416 (*Dsc1*), Desmoglein-1a (*Dsg1a*)] was assessed by qRT-PCR. Cycle thresholds were normalized  
417 to housekeeping genes (*Rplp2*, *Sptbn1* and *18S rRNA*) and normalized relative to Cq values of  
418 SPF condition. Each square represents average readings from keratinocytes ( $n=4$  technical  
419 replicates) derived from an individual mouse ( $n=4$  mice per group).  $*P < 0.01$ ,  $**P < 0.001$  by T-  
420 test adjusted by Bonferroni correction. **(F)** Primary keratinocytes were grown on transwells in  
421 5% FBS and 1.6mM Ca<sup>2+</sup>. Epithelial adhesion was assessed by measuring transepithelial  
422 electrical resistance (TEER) at indicated time points. Data from one experiment is represented  
423 for visualization (See Figure S2). One dot represents average TEER readings from technical  
424 replicates ( $n=3$ ) derived from one individual mouse ( $n=4$  mice per group).  $***P < 0.001$  by two-  
425 way ANOVA adjusted for multiple experiments. **(G)** To decrease skin microbial burden, wild-  
426 type SPF mice were treated with antibiotic cocktail ( $n=5$ ) or vehicle ( $n=6$ ) for two weeks. **(H)** To  
427 determine microbial burden, mice were swabbed 14 days after treatment and colony forming  
428 units (CFU) were determined. **(I)** Genomic DNA was extracted from swabs collected at baseline

429 (Day-0) and after one week of treatment (Day 7). V1-V3 region was amplified and analyzed by  
430 16S rRNA gene sequencing and overall abundance i.e. total operational taxonomic unit (OTUs)  
431 counts belonging to different phyla in each sample are depicted. Phyla with total read count  
432 <1000 are grouped into 'Other'. (See Figure S3) **(J)** At the end of two weeks the two groups of  
433 mice were tape stripped to achieve comparable insults and TEWL was measured and plotted  
434 against time [ANCOVA,  $F(1,41) = 26.315$ ,  $***P < 0.001$ ]. TEWL/TEER vs time readings were  
435 fitted by linear modeling (in **B**, **C**, **F** and **J**) and significance was assessed by ANCOVA analysis.  
436 Modeling parameters (adjusted  $R^2$  and  $F$ -statistics) are indicated on top-right for each plot. Span  
437 indicated by shaded area represents 95% CI. Temperature and humidity conditions during  
438 TEWL measurement are indicated for each experiment. Also see Figures S2 and S3.

439 **Figure 3. Activation of aryl hydrocarbon receptor (AHR) signaling in skin rescues barrier**  
440 **dysfunction in germ free mice. (A)** Differentially expressed genes (DEGs) in SPF vs GF mice,  
441 as identified by RNAseq, were mapped onto the AHR pathway.  $\text{Log}_2\text{FC}$  of significant DEGs  
442 ( $P < 0.01$ ) in SPF mice are represented in colored boxes according to the legend. **(B)** Schematic  
443 illustrating experimental design. Age matched 6-week-old, GF and SPF ( $n=5$  mice/group)  
444 C57/BL6 mice, respectively, were treated daily with 6-formylindolo[3,2-b] carbazole (FICZ) at  
445  $100\mu\text{g}/\text{kg}$  or vehicle for 2 weeks. At end of treatment dorsal skin of mice was tape-stripped to  
446 achieve comparable insults ( $\sim 20\text{g}/\text{m}^2/\text{h}$ ) and TEWL was measured up to 24 hours post-tape  
447 stripping to assess barrier recovery. TEWL vs time readings were fitted by linear modeling and  
448 covariance was assessed by ANCOVA. Barrier recovery was compared in **(C)** GF mice [ $F(1,47)$   
449  $= 21.9$ ,  $***P < 0.001$ ] and **(D)** SPF mice [ $F(1,57) = 2.98$ ,  $*P = 0.0492$ ] that were either treated with  
450 FICZ or vehicle. **(E)** Expression of genes [*Ahr*, *Cdsn*, *Cyp1a1*, *Cyp1b1*, *Dsg1a*, *Ivl* and *Krt14*]  
451 was assessed by qRT-PCR in GF mouse skin treated with FICZ or vehicle (4 mice per group).  
452 Cycle thresholds were normalized to housekeeping genes (*Rplp2*, *Sptbn1* and *18s rRNA*) and  
453 normalized relative to  $C_q$  values of FICZ treatment.  $*P < 0.05$ , by T-test adjusted by Bonferroni  
454 correction. **(F)** Primary human keratinocytes grown on transwells (in 5% FBS and  $1.6\text{mM Ca}^{2+}$ )

455 in presence of FICZ (0nM, 10nM and 100nM) for three days and transepithelial electrical  
456 resistance (TEER) was measured. Cells from different donors are represented by different  
457 symbol. See Figure S4. **(G)** Primary human keratinocytes (in 5% FBS and 1.6mM Ca<sup>2+</sup>) were  
458 treated as indicated with FICZ and/or AHR inhibitor at 100nM doses. TEER values at the end of  
459 three days of treatment are reported. \*\*\**P*<0.001 by T-test for panels F and G.

460 **Figure 4. Loss of aryl hydrocarbon receptor (AHR) in keratinocytes impairs skin barrier in**  
461 **mice. (A)** *Ahr* floxed (*Ahr*<sup>ff</sup>) allele was knocked out in mice using Cre driven by a keratin-14  
462 promoter (*K14*<sup>Cre/+</sup>*Ahr*<sup>ff</sup>). Dorsal skin was tape-stripped to achieve comparable insults (20-25  
463 g/m<sup>2</sup>/h) and TEWL recovery curves were compared between *Ahr*<sup>ff</sup> (n=5) and *K14*<sup>Cre/+</sup> *Ahr*<sup>ff</sup> (n=6)  
464 mice [ANCOVA, *F* (1,96) =131.34, \*\*\**P*<0.001]. **(B)** Primary mouse keratinocytes were derived  
465 from mice and polarized in 5% FBS and 1.6mM Ca<sup>2+</sup> for three days and transepithelial electrical  
466 resistance (TEER) was measured (\*\**P*<0.005, T-test). **(C)** *Ahr*<sup>ff</sup> (n=5) and *K14*<sup>Cre/+</sup> *Ahr*<sup>ff</sup> (n=7)  
467 mice were tape-stripped (TEWL=20 g/m<sup>2</sup>/h) and 10<sup>7</sup> CFU *S. aureus* containing tdTomato was  
468 applied to back skin. **(D)** 48 hours post-infection tissue was collected, weighed, homogenized  
469 and plated. *S. aureus* (visible as red colored colonies) and total bacterial colonies were counted  
470 (\*\**P*<0.005, T-test). **(E)** Model for atopic dermatitis induced by repeated epicutaneous  
471 sensitization of tape-stripped skin with ovalbumin (OVA) or vehicle (PBS) [30] was implemented.  
472 Mice were tape stripped at the beginning of the experiment (TEWL~20 g/m<sup>2</sup>/h) and OVA was  
473 applied daily for 7 days, 3 times with rest for 2 weeks between each treatment. At the end of  
474 final treatment, mice were tape-stripped (TEWL~40 g/m<sup>2</sup>/h) and 24 hours later **(F)** TEWL levels  
475 were assessed and **(G)** *S. aureus* was applied to back skin, *S. aureus* CFUs were determined  
476 (as described in E). Statistical significance in panels G and H were assessed using a 2-way  
477 ANOVA (\*\**P*<0.005, \*\*\**P*<0.0005). (See Figure S4)

478 **Figure 5. Commensal microbes curated from human skin restores skin barrier function in**  
479 **germ-free mice via AHR activation. (A)** Curation of bacteria for Flowers' Flora (FF)  
480 consortium. **(B)** HaCaT cells (10<sup>6</sup> cells/well) were co- transfected with plasmids containing a

481 *Firefly* luciferase reporter conjugated to *Cyp1a*- AHR response element and a *Renilla* luciferase  
482 as transfection control. Transfected cells were treated with indicated bacteria at indicated  
483 multiplicity of infection (MOI) and luminescence was measured. *Firefly* luciferase activities were  
484 normalized to *Renilla* luciferase levels and relative response compared to 10nM FICZ treatment  
485 (positive control) was computed. **(C)** Germ-free mice were colonized with FF daily for two  
486 weeks. Mice were swabbed at indicated days and CFUs were enumerated by plating on blood  
487 agar plates. **(D)** To determine whether individual bacteria of FF colonized skin, genomic DNA  
488 was extracted from skin swabs collected from mice at day 14 and qPCR analysis was  
489 conducted using species-specific primers for each bacterium and percentage composition  
490 relative to total 16S rRNA was determined. **(E)** Two-weeks post colonization mice (n=5  
491 mice/group) that were either germ-free (GF) or colonized with FF were tape stripped (TEWL  
492 ~20-30 g/m<sup>2</sup>/h) and **(F)** barrier recovery was assessed by TEWL (ANCOVA,  $F(1,157)=181.25$ ,  
493  $P<0.0001$ ). **(G)** Expression of genes [*Ahr*, *Cdsn*, *Cyp1a1*, *Cyp1b1*, *Dsg1a*, *Ivl* and *Krt14*] was  
494 assessed by qRT-PCR in mouse skin treated with FF or vehicle (GF). Cycle thresholds were  
495 normalized to housekeeping genes (*Rplp2*, *Sptbn1* and *18s rRNA*) and normalized relative to  
496 Cq values of FF treatment. \* $P<0.05$  and \*\* $P<0.005$  by T-test adjusted with Bonferroni  
497 correction. **(H)** Primary mouse keratinocytes were derived and polarized in 5% FBS and 1.6mM  
498 Ca<sup>2+</sup> for three days and transepithelial electrical resistance (TEER) was measured (\*\* $P<0.005$ ,  
499 T-test). **(I)** To test if improved barrier recovery via FF is through AHR, *K14<sup>Cre/+</sup>Ahr<sup>ff/ff</sup>* (n=6) were  
500 pre-colonized as shown in Fig. 4F and compared to *K14<sup>Cre/+</sup>Ahr<sup>ff/ff</sup>* (n=3) that were treated with  
501 Control (Ctrl) [ANCOVA,  $F(1,61)=0.1191$ ,  $P=0.73115$ ]. Additionally, *Ahr<sup>ff/ff</sup>* mice that were  
502 colonized (n=4) and untreated (n=3) were included in comparisons. **(J)** To test if pre-  
503 colonization with FF could improve barrier recovery in an epicutaneous sensitization model, we  
504 pre-colonized C57BL6/J mice (n=5) with FF for 2-weeks. At the end of colonization, mice were  
505 tape-stripped and treated with Ovalbumin for 1-week. Mice were subjected to comparable  
506 insults (TEWL~40g/m<sup>2</sup>/h) and barrier recovery kinetics were compared in FF colonized versus

507 control (non-colonized) mice. FF colonized mice showed improved barrier recovery compared to  
508 control mice [ANOVA,  $**P<0.01$ ]. (See Figures S5).

509

## 510 **MATERIALS AND METHODS**

### 511 **RESOURCE AVAILABILITY**

#### 512 ***Lead contact***

513 Further information and requests for resources and reagents should be directed to and will be  
514 fulfilled by the corresponding author, Elizabeth Grice ([egrice@penncmedicine.upenn.edu](mailto:egrice@penncmedicine.upenn.edu)).

### 515 **EXPERIMENTAL MODEL AND SUBJECT DETAILS**

#### 516 **Animal models and husbandry conditions**

517 All mouse experiments were conducted under protocols approved by the University of  
518 Pennsylvania Institutional Animal Care and Use Committee (Protocol #804065). Age-matched  
519 6-8 weeks old mice were used for all experiments. The following strains of mice were used in  
520 these studies: C57BL6/J (JAX stock #000664), Rag1 KO (JAX stock #002216)[78], Ahr<sup>fx</sup> (JAX  
521 stock #006203)[79] and K14cre (JAX stock #018964)[80].

522 *Germ-free studies* were conducted in the Penn Gnotobiotic Mouse facility. Indicated  
523 strains were bred and maintained as germ-free (GF) in flexible vinyl isolators at the Penn  
524 Gnotobiotic Mouse facility housed in the University of Pennsylvania, School of Veterinary  
525 Medicine. Mice were housed as 3-5 mice per cage, until they were euthanized for tissue  
526 harvest. Aggressive mice or those that showed scratching wounds were not used in the studies.  
527 SPF counterparts were purchased from Jackson Laboratories and allowed to acclimatize in the  
528 facility for one week prior to beginning any experiments. One week prior to beginning of an  
529 experiment, mice (GF or SPF) were transferred to hermetically-sealed cages with individually  
530 filtered-positive airflow. The mice were maintained in these cages for the duration of the study.  
531 This allowed similar housing conditions for both GF and SPF mice for consistent TEWL  
532 readings. All mice were given autoclaved bedding, water and irradiated chow (5021

533 Autoclavable Mouse Breeder Diet, LabDiet®). Mouse handling was conducted in a laminar flow  
534 cabinet through double layer protective gloves. Germ-free status of mice was confirmed by  
535 weekly bacterial checks by the germ-free facility. At the end of each experiment, mice were  
536 autopsied and germ-free status was confirmed by enlarged cecum. Additionally, skin swabs,  
537 fecal pellet, and bedding samples were cultured by on blood-agar plates.

538 Studies in wild-type and AHR KO mice were conducted in Clinical Research Building  
539 vivaria at the University of Pennsylvania. C57BL6/J mice were maintained and bred by lab  
540 personnel. To generate  $K14^{Cre/+}Ahr^{ff}$  mice  $Ahr^{ff}$  mice were crossed with  $K14^{Cre/+}$  mice to  
541 generate  $K14^{Cre/+}Ahr^{f/+}$  F1 mice,  $K14^{Cre/+}Ahr^{f/+}$  F1 mice were backcrossed to  $Ahr^{ff}$  mice to obtain  
542 experimental mice ( $K14^{Cre/+}Ahr^{ff}$ ) and litter-mate controls ( $Ahr^{ff}$ ) lacking *Cre*. To ensure  
543 robustness of studies, mice were randomly housed. Genotyping protocol:  $Ahr^{ff}$  status was  
544 determined using PCR primers oIMR6075-Reverse (5' CAG TGG GAA TAA GGC AAG AGT GA  
545 3') and oIMR6076-Forward (5' GGT ACA AGT GCA CAT GCC TGC 3') and resolving on a 5%  
546 polyacrylamide gel. *Cre* allele was determined using Generic Cre protocol (Protocol #22392,  
547 Jax Lab, Version 1.3) and resolved on a 2.5% Agarose gel.

#### 548 **Primary keratinocytes from adult mouse skin**

549 Keratinocytes were derived from mouse tail or ear skin as described previously with  
550 slight modifications [81]. Following euthanasia mouse ears and/or tail were excised. With the  
551 help of forceps, ears were split into dorsal and ventral halves. To peel the tail skin from the  
552 bone, a scalpel was used to cut along the ventral axis from base of tail to tip. The exposed tail  
553 bone was peeled off using blunt-tip forceps. The resultant skin was cut into 0.75cm<sup>2</sup> pieces.  
554 Skin obtained from ears and tails were incubated dermis side down in 6-well dishes and floated  
555 in ice-cold dispase (1mg/ml) in 1X PBS overnight at 4°C. Epidermal sheets were separated by  
556 lifting the epidermis using forceps. The separated epidermal sheets were cut into tiny pieces  
557 using forceps and scissors and incubated in 60mm untreated culture dish containing 2ml of  
558 0.25% Trypsin-EDTA at 37°C, 5% CO<sub>2</sub> for 15 minutes. At this point, 5ml suspension media

559 (DMEM+10% FBS+ P/S) was added to the dish and the skin pieces were pipetted vigorously  
560 using a 10ml pipette to obtain a single cell suspension. Cell suspension was centrifuged at 150g  
561 for 5 minutes at 4°C and supernatant was removed. The cell pellet was suspended in 10ml  
562 suspension media and passed through 100µm cell strainer. Cell suspension was centrifuged at  
563 150g for 15 minutes at 4°C, supernatant was removed and cells were suspended in 1ml  
564 suspension media and plated in collagen-coated 60mm dishes at 0.5 mouse equivalents (i.e. 5  
565 million cells/ml) in plating media (low Ca<sup>2+</sup> KSFM+ growth supplements+ 5% dialyzed FBS+4%  
566 DMEM) containing 10µM ROCK inhibitor (abcam120129) to prevent differentiation as described  
567 previously[82]. Typical cell counts were 2-5 x 10<sup>6</sup> cells per mouse (cell count) and viability  
568 greater than 70% (cell viability) as determined by Trypan blue exclusion assay. Dishes were  
569 collagen coated by incubating 1.5ml collagen solution (50µg/ml collagen in 0.02N acetic acid)  
570 for 1 hour at 37 °C, 5% CO<sub>2</sub> or overnight at room temperature. After incubation plates were  
571 rinsed 3 times with 1X PBS. Cells were remained undisturbed for 48 hours and then passaged  
572 for different experiments. Cells were maintained at 37°C in an atmosphere of 5% CO<sub>2</sub> with  
573 humidity.

#### 574 ***Human keratinocyte cultures***

575 Primary cultures of human keratinocytes were obtained from neonatal foreskins through  
576 the Penn Dermatology Skin Biology and Diseases Resource-based Center: Skin Translational  
577 Research Core (STaR) Core B (visit: <https://dermatology.upenn.edu/sbdrcc/core-b/>). Each  
578 experiment was conducted with at least three donors (as indicated in text). All experiments were  
579 conducted with cells at passage number less than 4. Briefly, cell suspensions were generated  
580 using dispase and trypsin, and the cells were cultured in a keratinocyte growth media [50%  
581 Medium 154, M154500 (Life Technologies), 50% Keratinocyte SFM, 17005042 (Life  
582 Technologies), 1% HKGS supplement, S0015 (Life Technologies), 1% Antibiotic/Antimycotic,  
583 15240062 (Invitrogen)]. For routine passaging, cells were split when they were less than 70%  
584 confluent. Cells were washed with 1X PBS and trypsinized with 0.25% Trypsin-EDTA for 5

585 minutes, trypsin was inactivated using trypsin inhibitor (R007100, Thermo Fisher Scientific) and  
586 cell suspension was centrifuged. Following removal of supernatant, cell pellet was suspended in  
587 culture media and seeded as per experimental design. Cells were maintained at 37°C in an  
588 atmosphere of 5% CO<sub>2</sub> with humidity.

589 Immortalized human keratinocyte HaCaT cells [83] were used for AHR reporter assay.  
590 HaCaT cells were verified for lack of mycoplasma contamination by ATCC. Experiments were  
591 conducted on cells that were at passage numbers between 26-36. For routine cell culture,  
592 HaCaTs were maintained in DMEM high glucose (11965092, Thermo Fisher Scientific)  
593 supplemented with 1% Sodium Pyruvate, 5% FBS, 1% Antibiotic/Antimycotic, 15240062  
594 (Invitrogen) and 1% Non-essential amino acids). For routine passaging, cells were split when  
595 they were less than 70% confluent. Cells were washed with 1X PBS and trypsinized with 0.25%  
596 Trypsin-EDTA for 5 minutes, trypsin was quenched with DMEM containing 5% FBS. Cells were  
597 maintained at 37°C in an atmosphere of 5% CO<sub>2</sub> with humidity.

### 598 **Microbial strains**

599 The Flowers' Flora Consortium, consisted of *Staphylococcus epidermidis* (EGM 2-01),  
600 *Staphylococcus hemolyticus* (EGM 2-08), *Staphylococcus warneri* (EGM 2-09), *Micrococcus*  
601 *luteus* (EGM 2-04) and *Corynebacterium aurimucosum* (EGM 2-02), that had been isolated from  
602 healthy human skin and maintained in the Grice lab culture repository (number in parenthesis  
603 indicates identifier code in Grice lab culture collection). The *S. aureus* strain (AH3926) used in  
604 these studies was generously provided by Dr. Alexander Horswill (University of Colorado,  
605 Anschutz Medical Campus). *S. aureus* AH3926 consists of tdTomato stably integrated into *S.*  
606 *aureus* LAC (AH1263) and it's construction has been described in detail previously [60].  
607 Culturing conditions: All strains were cultured on solid blood agar plates at room temperature for  
608 24-48 hours. For liquid cultures, all species (except *M. luteus*) were inoculated in tryptic soy  
609 broth and grown by shaking at 100rpm at 37°C. *M. luteus* was inoculated in nutrient broth.

### 610 **METHOD DETAILS**



## 611 **RNA-sequencing of murine epithelia and analysis**

612 Mice were shaved, and skin was collected from dorsal region. The fat layer was scraped  
613 off using a scalpel and then the skin was floated in dispase (1mg/ml) in 1X PBS overnight at  
614 37°C for 1 hour in order to separate the epidermis from the dermis. The epidermis was stored in  
615 RNAlater. Mouse epidermis that had been stored in RNA-Later (Thermo-Fisher) was blotted dry  
616 and approximately 20 mg of tissue was placed in a Lysing Matrix A tube (MP Bio) with 600 µl  
617 RLT buffer (Qiagen) containing 2-mercaptoethanol. The tissue was homogenized with three, 1  
618 min bursts of bead beating in a FastPrep 24 (MP Bio). The lysate was centrifuged (14,000 x g,  
619 3 min) and the supernatant was transferred to a new tube to which 1 volume of 70 % ethanol  
620 was added. RNA was purified using a RNeasy Tissue Kit (Qiagen), as per manufacturer's  
621 guidelines. RNA was quantified on a Qubit and RNA-integrity was assessed using BioAnalyser  
622 according to manufacturer's instructions. 1µg RNA was used to construct RNA-seq libraries  
623 using the stranded-TruSeq RNA Sample Prep Kit (Illumina), spiked with phiX and sequenced on  
624 the Illumina NextSeq-500 Platform in 3 runs of 1x75 reads. The three runs were aggregated and  
625 then analyzed and aligned against the mouse genome [Genome Reference Consortium Mouse  
626 Build 38 patch release 5 (GRCm38.p5)] using AlignerBoost [84] and STAR 2.5.3[85]. Gene  
627 counts were fitted into a negative binomial model where both the gnotobiotic condition (SPF, GF  
628 or COL) and sex of the mouse were included using the DESeq2 [86] R package . Pairwise  
629 DEGs between conditions were obtained by setting corresponding "contrasts" for each pairwise  
630 comparison and filtering genes with FDP adjusted p-values less than 0.1. To identify enriched  
631 Gene Ontology (GO) terms, all annotated GO terms for aforementioned DEGs were retrieved  
632 using the ENSEMBL biomaRt R package[87], and significant enriched GO terms were identified  
633 using the topGO R package with the FDR-adjusted *p*-values < 0.1 under dependency  
634 [88]. Uniquely enriched GO terms were selected by grouping similar GO terms using the online  
635 GO visualization tool REVIGO[89] with default (medium) similarity settings.

## 636 **16S rRNA Gene Sequencing**

637 Sample collection

638 Mice were swabbed prior to shaving with sterile foam-tipped applicators (Puritan) as  
639 described previously [49]. The swabs were snap frozen and stored at  $-80^{\circ}\text{C}$  immediately  
640 following collection. Bacterial DNA was extracted from swabs as described [90]. In brief, swabs  
641 were incubated for one hour at  $37^{\circ}\text{C}$  with shaking in  $300\mu\text{L}$  yeast cell lysis solution (from  
642 Epicentre MasterPure Yeast DNA Purification kit) and 10,000 units of ReadyLyse Lysozyme  
643 solution (Epicentre). Samples were subjected to bead beating for ten minutes at maximum  
644 speed on a vortex mixer with 0.5 mm glass beads (MoBio), followed by a 30-minute incubation  
645 at  $65^{\circ}\text{C}$  with shaking. Protein precipitation reagent (Epicentre) was added and samples were  
646 spun at maximum speed. The supernatant was removed, mixed with isopropanol and applied to  
647 a column from the PureLink Genomic DNA Mini Kit (Invitrogen). Instructions for the Invitrogen  
648 PureLink kit were followed exactly, and DNA was eluted in 50 mL elution buffer (Invitrogen). At  
649 each sampling event, swab control samples that never came into contact with the skin were  
650 collected, prepared and sequenced exactly as the experimental samples. No significant  
651 background contamination from either reagent and/or collection procedures was recovered.

652 Sequencing and analysis

653 Amplification of the 16S rRNA gene V1–V3 region was performed as described  
654 previously [90]. Sequencing was performed at the PennCHOP microbiome core on the Illumina  
655 MiSeq using 300 bp paired-end chemistry. The mock community control (MCC; obtained from  
656 BEI Resources, NIAID, NIH as part of the Human Microbiome Project: Genomic DNA from  
657 Microbial Mock Community B (Even, Low Concentration), v5.1L, for 16S rRNA Gene  
658 Sequencing, HM-782D) was sequenced in parallel. Sequencing of the V1-V3 region was  
659 performed using 300 bp paired-end chemistry. Sequences were preprocessed and quality  
660 filtered prior to analysis, including size filtering to 460-600 nucleotides. HmmUFOtu was used  
661 for sequence alignment and phylogeny-based OTU clustering as described previously [91].

662 Statistical analysis and visualization was performed using the phyloseq package [92] in the R  
663 statistical computing environment.

#### 664 **Barrier recovery**

665 Barrier was assessed as described [93, 94] by using noninvasive probe  
666 (Courage+Khazaka, Cologne, Germany) to measure transepidermal water loss (TEWL) by  
667 diffusion (Tewameter®, TM300) according to the manufacturer's instructions. The dorsal flanks  
668 of mice were shaved 24 hours prior to beginning of barrier analyses. Basal epidermal  
669 permeability barrier function was assessed 24 hours after shaving. Barrier was disrupted by  
670 tape stripping (3M Scotch High Performance Packaging Tape, 2"X800") to achieve comparable  
671 insults between experimental and control groups as indicated for each experiment. Mice were  
672 anesthetized using isoflurane during TEWL measurements. TEWL measurements were  
673 averaged at 1-second intervals for a 30 second period. Indoor ambient temperature and mean  
674 relative humidity were recorded for each experiment. For barrier recovery assessment, TEWL  
675 was measured by placing probe at the same location on the dorsal flank of the mouse each  
676 time. For consistency, the same person made all TEWL measurements.

#### 677 **Antibiotic treatment of mice**

678 An antibiotic cocktail consisting of Metronidazole (1g/L), Sulfamethoxazole (0.8g/L),  
679 Trimethoprim (0.16g/L), Cephalexin (4g/L) and Baytril (0.025g/L) dissolved in drinking water  
680 containing Splenda (1 packet/250ml) as sweetener was provided to the mice for two weeks. To  
681 ensure decreased microbial burden, cages were changed 3 times a week for antibiotic treated  
682 mice as described previously [49]. Control cages were changed once a week, as per  
683 conventional policies to ensure microbial biodiversity.

#### 684 **Differentiation assay**

685 Confluent cells were trypsinized (0.25% Trypsin EDTA) and plated at  $10^4$  cells/well in 12  
686 well collagen coated dishes without ROCK inhibitor. Cells were allowed to grow to confluency  
687 (typically 2-3 days) and then media was switched to cornification medium i.e. traditional E-media

688 without EGF (3 parts DMEM+ 1 part DMEM/F12 + 5% FBS + cholera toxin + insulin + adenine +  
689 hydrocortizone + antibiotics) for three days, to induce polarization and transmembrane junction  
690 formation in keratinocytes [95]. At the end of three days cells were scraped off and processed  
691 for qPCR analyses.

#### 692 **Transepithelial electrical resistance (TEER) measurements**

693 Keratinocytes were trypsinized (0.25% Trypsin EDTA) and plated at  $10^4$  cells/well on  
694 collagen coated 12mm transwells with 0.4 $\mu$ m pore (Sigma-Aldrich; CLS3460). Twenty-four  
695 hours post-plating cells were 100% confluent and media was switched to KSFM containing 5%  
696 FBS and 1.6mM  $Ca^{2+}$ . Every 24 hours, transepithelial electrical resistance (TEER) was  
697 measured using an epithelial volt/ohm meter (EVOM) using a STX2 manual electrode. To  
698 measure TEER, three readings were taken per chamber to cover three different areas of the  
699 transwell membrane longitudinally over three days. The electrode was cleaned with 0.5%  
700 bleach followed by 70% ethanol between each transwell. Readings are reported in ohms-cm<sup>2</sup>.

701 *FICZ and AHR inhibitor treatments:* For experiments described in Figure 4, primary human  
702 keratinocytes were seeded on transwells and grown in presence of 100nM each of AHR ligand  
703 6-formylindolo[3,2-b] carbazole (FICZ) (Sigma-Aldrich, #SML1489) and/or AHR inhibitor (Sigma  
704 Aldrich, #CH-223191) throughout the course of the experiments.

#### 705 **Tissue preparation and immunofluorescence analysis**

706 Murine skin tissue was collected and fixed in 4% paraformaldehyde and embedded in  
707 paraffin and sectioned at 6 $\mu$ m, as described previously[10]. Immunofluorescence protocols are  
708 described in detail at [dx.doi.org/10.17504/protocols.io.k95cz86](https://dx.doi.org/10.17504/protocols.io.k95cz86) [96]. Briefly, tissue sections were  
709 deparaffinized with xylenes and rehydrated with graded ethanol. Heat-induced antigen retrieval  
710 was performed in 0.01M citrate buffer, pH 6.0 and blocked in 10% normal goat serum.  
711 Antibodies against the following proteins were used at indicated dilution: Cytokeratin-10 1:1000  
712 (Biolegend, #905401), Desmoglein 1a 1:200 (Abcam, #ab124798), Loricrin 1:500 (Biolegend,  
713 #905101). Alexafluor 594 conjugated goat-anti rabbit 1:1000 (ThermoFisher Scientific,

714 #A32740) was used as secondary antibodies. Tissue was counterstained with Hoechst stain.  
715 Wide-field fluorescent images were acquired using by means of a 20X lens objective on a Leica  
716 DM6000 Widefield Fluorescence Microscope at the University of Pennsylvania, School of  
717 Veterinary Medicine Imaging core. For purpose of quantification 10-12 random images were  
718 taken in a blinded fashion at constant light exposure of 100 miliseconds for the Alexafluor 594  
719 channel and 10 seconds for the Hoechst Stain. Images were processed using ImageJ software  
720 version 10.2 (NIH, Bethesda, MD). Krt10, Dsg1a, and Loricrin levels of each image were  
721 calculated by the integrated density of the signal, normalized to the Hoechst stain signal from  
722 the same area. For statistical analysis, each stain was calculated by taking average levels in  
723 each corresponding to 10-12 images per mouse and a two-sided T-test was used to determine  
724 the significance of signal differences between groups.

#### 725 **Electron Microscopy**

726 The ultrastructural analysis by EM was performed as described previously [97] at the VA  
727 Medical Center and Department of Dermatology at the University of California, San Francisco,  
728 United States. Skin samples were fixed in 2% glutaraldehyde and 2% paraformaldehyde and  
729 post-fixed in reduced ruthenium tetroxide before epoxy embedding. The samples were cut on a  
730 Leica Ultracut E microtome (Leica microsystems, Wetzlar, Germany) and imaged on a JEOL  
731 100CX transmission electron microscope (JEOL, Tokyo, Japan) using a Gatan digital camera.  
732 For quantification, the thickness of the cornified envelope was measured in at least 25 randomly  
733 selected positions in 5 random high-powered electron micrographs of the mid stratum corneum  
734 from three mice of each colonization state. The observer recording these measurements was  
735 blinded to the groups.

#### 736 **AHR reporter assay**

737 Immortalized human keratinocyte HaCaT cells [83] were seeded in 96 well plates at  $10^4$   
738 cells/well in 100 $\mu$ l KSMF media supplemented with supplements. Twenty-four hours later, when  
739 cells were 80-90% confluent, each well was co-transfected with 20ng of *Renilla* luciferase DNA

740 pGL4.74 (Promega) and 180ng of *Firefly* luciferase reporter plasmids: pGL4.23 which has  
741 xenobiotic response element (XRE) corresponding to *Cyp1A1* activity. Construction of plasmid  
742 is described previously[20]. Transient transfections of HaCaT cells was performed with  
743 Fugene® HD (Promega, #E2311) at 3:1 Fugene transfection reagent: DNA ratio according to  
744 manufacturer instructions. Twelve hours post-transfection, media containing transfection  
745 complexes was removed and replaced with media containing either indicated bacterial strains to  
746 represent MOI=0.1, 1 and 10, peptidoglycan (10ng) or FICZ (10nM). Twenty-four hours post-  
747 infection, dual luciferase readings (*Renilla* and *Firefly*) were read using Dual-Luciferase®  
748 reporter assay system (Promega, #E1910) on the BioTek Synergy HT fluorescence plate  
749 reader. Background correction was performed by subtracting readings of empty wells from  
750 observed readings and *Firefly* luciferase activity was normalized to *Renilla* luciferase. Relative  
751 response ratio to compare *CYP1A1* induction by each bacterial species to treatment with known  
752 AHR ligand FICZ (10nM) was computed as follows:  $RRR = \frac{[(\text{experimental sample ratio}) - (\text{negative control ratio})]}{[(\text{positive control ratio}) - (\text{negative control ratio})]}$ [98]. Experimental  
753 sample refers to cells treated with indicated bacteria or peptidoglycan; negative control refers to  
754 unstimulated cells and positive control refers to cells stimulated with 10nM FICZ.

#### 756 **cDNA synthesis for qPCR analyses**

757 Mouse skin or epidermis that had been stored in RNA-Later (Thermo-Fisher) was blotted  
758 dry and approximately 20 mg of tissue was placed in a Lysing Matrix A tube (MP Bio) with 600  
759  $\mu$ l RLT buffer (Qiagen) containing 2-mercaptoethanol. The tissue was homogenized with three,  
760 1 min bursts of bead beating in a FastPrep 24 (MP Bio). The lysate was centrifuged (14,000 x  
761 g, 3 min) and the supernatant was transferred to a new tube to which 1 volume of 70 % ethanol  
762 was added. RNA was purified using a RNeasy Tissue Kit (Qiagen). Traces of DNA were  
763 removed with DNase-1 and the RNA was stored at -80°C. RNA was quantified (Qubit) and 10 ng  
764 RNA was used as a template for Superscript III (Invitrogen) reverse transcription with random  
765 hexamer primers. Following treatment with RNase H, the cDNA was stored at -20°C.

## 766 **Colonizing mice with human skin commensals**

767 For liquid cultures of human skin commensals, *S. epidermidis*, *S. warneri*, *S.*  
768 *hemolyticus* and *C. aurimucosum* were inoculated in tryptic soy broth (TSB) and *M. luteus* was  
769 inoculated in nutrient broth media, respectively and grown by shaking at 200rpm for 16 hours at  
770 37°C. Cultures were centrifuged, media was removed and bacterial pellets were suspended in  
771 PBS to obtain 10<sup>9</sup> CFU/ml. Equal amount of each bacteria (10<sup>9</sup> CFU) was combined in 5ml PBS  
772 and inoculated in bedding of mouse cages daily for 2 weeks. For each inoculum, a fresh batch  
773 culture was grown overnight.

## 774 **Mouse treatment with AHR ligand FICZ**

775 Mice were treated with a low dose (100µg/kg) of AHR ligand 6-Formylindolo[3,2-b]  
776 carbazole (FICZ) (Sigma-Aldrich, #SML1489), that has been shown to be sufficient to induce  
777 expression of *Cyp1a1*[54]. A stock solution (4.5mg/ml) of FICZ was made in DMSO and diluted  
778 in 50% Acetone. Mice were shaved 24 hours prior to treatment and FICZ was applied topically  
779 by directly pipetting onto shaved skin, daily for 2 weeks (**Figure 3B**).

## 780 ***S. aureus* skin infection protocol**

781 *Epicutaneous infection:* Infection protocol for epicutaneous infection with *S. aureus* has  
782 been described previously [99] and was implemented with slight modifications. Briefly, mice  
783 were anesthetized with isoflurane, tape stripped (TEWL=20 g/m<sup>2</sup>/h) and 24 hours later, 10<sup>7</sup> CFU  
784 *S. aureus* in 100µl was applied to back skin and spread using a swab. The inoculum was  
785 allowed to dry for 10 minutes and mice were returned to their cages.

786 *CFU enumeration:* Forty-eight hours post-infection, mice were euthanized and  
787 approximately 1cm<sup>2</sup> infected skin area was collected and weighed and transferred to tubes  
788 containing 300µl 1X PBS. Tissue was homogenized by bead beating for twenty minutes at  
789 maximum speed on a vortex mixer with 0.5 mm ceramic beads and CFUs were enumerated by  
790 serial dilution on blood agar plates after overnight incubation at 37°C. Both *S. aureus* and total  
791 bacterial counts were determined and normalized to weight of tissues. *S. aureus* colonies were

792 visible as red colonies due to stable expression of tD<sub>Tomato</sub> and could be distinguished from  
793 total bacteria.

#### 794 **Epicutaneous sensitization with ovalbumin**

795           Procedures to induce barrier defects that mimic atopic dermatitis by repeated  
796 epicutaneous sensitization by ovalbumin (OVA) [30, 100] followed by infection with *S. aureus*  
797 [101] have been described previously. The dorsal skin of mice was shaved and TEWL was  
798 assessed to give a baseline reading. To measure and compare barrier repair between wild-type  
799 and AhR null mice, we standardized the amount of initial barrier disruption to give identical  
800 TEWL values. To achieve this, mice were tape stripped to give a reading of TEWL ~20g/m<sup>2</sup>/h.  
801 Twenty-four hours post tape-stripping, the mice were treated daily for 7 days with 100 µg OVA  
802 (Sigma Aldrich, # A5503) suspended in 100 µl PBS was applied onto backs of mice and spread  
803 using a skin swab, and allowed to dry for 2 minutes. For inducing atopic dermatitis-like  
804 condition, the 7-day OVA treatment regime was repeated twice more, with 2 weeks rest  
805 between subsequent treatments. At the end of treatment mice were mice were tape stripped to  
806 give a reading of TEWL ~40g/m<sup>2</sup>/h and *S. aureus* was applied as described earlier or barrier  
807 recovery was assessed.

#### 808 **QUANTIFICATION AND STATISTICAL ANALYSIS**

##### 809 **Data visualization and statistics.**

810 All statistical analysis was performed using functions built into the R statistical environment  
811 (RStudio Version 1.3.1056). Data was visualized using ggplot2 [102] package and GraphPad  
812 Prism version 8.0.0 for Mac OS X, GraphPad Software, San Diego, California USA,  
813 [www.graphpad.com](http://www.graphpad.com). TEWL/TEER vs time readings were fitted by linear modeling function in R  
814 statistical package and visualized using ggplot2 package. Significance was assessed by  
815 ANCOVA analysis. Fit parameters (adjusted  $R^2$  and  $F$ -statistics) are indicated for each plot.  
816 Span indicated by shaded area represents 95% CI. Gene expression analysis from qPCR was  
817 conducted as per guidelines described previously[103]. Cycle thresholds were normalized to



818 housekeeping genes (Rplp2, Sptbn1 and 18s rRNA) and normalized relative to quantitative  
819 cycle (Cq) values of control. Heatmaps for qPCR analysis were made using Morpheus heat map  
820 viewer from Broad Institute (<https://software.broadinstitute.org/morpheus>). Each square  
821 represents average normalized readings (n= 3 technical replicates). Bonferroni correction was  
822 used to adjust for multiple comparisons. The AHR pathway was originally downloaded from  
823 wikipathways (<https://www.wikipathways.org/index.php/Pathway:WP2873>), then modified by  
824 highlighting DEGs identified in our analysis using a customized Perl script. The log<sub>2</sub> fold-change  
825 values between SPF and GF mice were used to determine the color hue (red/blue: up/down in  
826 SPF vs. GF) and saturation of the highlighted DEGs.

827

828

## 829 **KEY RESOURCES TABLE**

## 830 **SUPPLEMENTARY MATERIALS**

### 831 **Table S1. Related to Figure 1.**

832 Results from differential expression analysis of RNA-seq data for genes depicted in Fig. 1F. As  
833 a result, we identified 6,396, 427, and 3,232 DEGs for SPF vs. GF, COL vs. GF and SPF vs.  
834 COL comparisons, respectively. DEGs defined as those with FDR adjusted p-values < 0.1. In  
835 Sheet SPF vs GF (upregulated in SPF: log<sub>2</sub>FC > 0, downregulated in SPF: log<sub>2</sub>FC < 0); in  
836 sheet COL vs GF (upregulated in COL: log<sub>2</sub>FC > 0, downregulated in COL: log<sub>2</sub>FC < 0); in  
837 sheet SPF vs COL (upregulated in SPF: log<sub>2</sub>FC > 0, downregulated in SPF: log<sub>2</sub>FC < 0).

838 **Table S2. Related to Figure 1.** Contains list of genes manually curated based on literature  
839 analyses that have been implicated in barrier function. Genes are listed under the following  
840 categories based on their functions: adherence junction formation, lipid-lamellae formation,  
841 keratin network, differentiation, skin barrier development, formation of cornified envelope and  
842 basement membrane.

843 **Table S3. Related to Figure 1.** Contains the key genes involved in skin barrier function that  
844 were differentially expressed between SPF and GF murine skin and were used to generate  
845 graph depicted in Figure 1F.

846 **Table S4. Related to Figure 1.** Contains list of differentially expressed barrier genes involved in  
847 skin barrier function that were differentially expressed between SPF and GF murine skin by  
848 using genes described in Table S2 as reference.

849 **Figure S1. Related to Figure 1.** Structural analysis of murine dorsal skin from SPF and GF  
850 mice. **(i)** Histopathological analysis of Hematoxylin and Eosin stained tissue did not demonstrate  
851 overt differences between age-matched GF and SPF mice. **(ii)** Electron Microscopy (EM) was  
852 performed on skin and number of layers of cornified envelope were counted. \*\*\* indicates  
853  $P < 0.01$ , T-test.

854 **Figure S2. Related to Figure 2.** Assessment of **(A)** TEWL and **(B)** pH at baseline in age-  
855 matched age-matched germ-free (GF) and specific pathogen-free (SPF) C57BL6/J mice (n=4  
856 mice per group). **(C)** Shown is indicated TEWL corresponding to number of tape strips in GF vs  
857 SPF mice. **(D)** GF and SPF *Rag1*<sup>-/-</sup> mice were swabbed colony forming units (CFU) were  
858 determined and **(E)** TEWL was measured at baseline. **(F)** Dorsal skin from GF and SPF *Rag1*<sup>-/-</sup>  
859 mice was collected and gene expression was analyzed by qRT-PCR. Cycle thresholds were  
860 normalized to housekeeping genes (*Rplp2*, *Sptbn1* and *18s rRNA*) and normalized relative to  
861 Cq values of SPF condition. Each square represents average readings from three technical  
862 replicates from each mouse. \* $P < 0.01$ , \*\*  $P < 0.001$  by T-test adjusted by Bonferroni correction.  
863 **(G)** Primary keratinocytes were derived from germ free mice and grown on transwells in basal  
864 medium before switching to cornification media containing 5% FBS and 1.6mM Ca<sup>2+</sup>. Shown  
865 here is expression of genes between GF and SPF mice before and after calcium switch.  
866 Expression of genes involved in differentiation [Involucrin (*Ivl*), cytokeratin-10 (*Krt10*)] and  
867 adherence [Corneodesmosin (*Cdsn*), Desmocollin-1 (*Dsc1*), Desmoglein-1a (*Dsg1a*)] and AHR  
868 pathway (*Cyp1a1*, *Cyp1b1*, *Hsp90ab1*) was assessed by qRT-PCR. Cycle thresholds were

869 normalized to housekeeping genes (*Rplp2*, *Sptbn1* and *18s rRNA*) and normalized relative to  
870 Cq values of SPF condition. Each square represents average readings from technical replicates  
871 (n= 4 technical replicates) derived from an individual mouse (n=4 mice per group). \* $P<0.01$ , \*\*  
872  $P<0.001$  by T-test adjusted by Bonferroni correction. **(H)** Primary keratinocytes grown on  
873 transwells were grown in 5% FBS and 1.6mM  $Ca^{2+}$  epithelial adhesion was assessed by  
874 measuring transepithelial electrical resistance (TEER) at indicated time points. Data from three  
875 individual experiments are shown. One dot represents average TEER readings from technical  
876 replicates (n=3) derived from one individual mouse (n=4 mice per group).

877 **Figure S3. Related to Figure 2.** To decrease skin microbial burden, wild-type SPF mice were  
878 treated with antibiotic cocktail (n=5) or vehicle (n=6) for two weeks. Genomic DNA was  
879 extracted from skin swabs and fecal samples collected at baseline (Day 0 i.e. D0) and after one  
880 week of treatment (Day 7 i.e. D7). V1-V3 region was amplified and analyzed by 16S rRNA gene  
881 sequencing. **(A)** Microbiota composition of each sample shown as the relative abundance of the  
882 top 15 most abundant genus of the entire dataset. **(B)** Fecal pellets collected at end of treatment  
883 (i.e. 14 days later) were weighed, homogenized and plated on blood agar plates and CFUs were  
884 enumerated. **(C)** Within-sample alpha diversity for samples from groups shown as the Shannon  
885 index. The within sample Shannon index was calculated using the Phyloseq R package. **(D)**  
886 Principle Coordinates Analysis (PCoA) plot of between microbiota sample beta-diversity for  
887 different sample types (skin or fecal) and antibiotic treatment (control or antibiotic). Ctrl: control  
888 treatment, Abx: Antibiotic treatment. Treatment timepoint was color labeled. The Bray-Curtis  
889 dissimilarity was used for the between-sample beta-diversity metric.

890 **Figure S4. Related to Figure 4.** TEWL dynamics during the course of ovalbumin sensitization  
891 treatment regime. **(A)** Schematic depicts sequence of manipulations to mice during OVA  
892 sensitization. Mice were tape stripped at the beginning of the experiment (TEWL~20 g/m<sup>2</sup>/h)  
893 and OVA was applied daily for 7 days, 3 times with rest for 2 weeks between each treatment. At  
894 the end of final treatment, mice were tape-stripped (TEWL~40 g/m<sup>2</sup>/h) and *S. aureus* was

895 applied to back skin. **(B)** TEWL readings were taken at indicated time points in **(i)**  $K14^{Cre/+} Ahr^{ff}$   
896 and **(ii)**  $Ahr^{ff}$  mice treated with OVA or vehicle (PBS). Endpoint readings are reported in Figure  
897 4. **(C)** Total bacterial counts per gram of tissue are reported for  $K14^{Cre/+} Ahr^{ff}$  (KO) and  $Ahr^{ff}$   
898 (WT) mice for indicated comparisons.

899 **Figure S5. Related to Figure 5.** TEWL dynamics during the course of short-term ovalbumin  
900 sensitization treatment regime after Flowers' Flora colonization **(A)** Schematic depicts sequence  
901 of manipulations to C57BL6/J mice. Mice were pre-colonized with Flowers' Flora daily for 2  
902 weeks. At the end of pre-colonization, mice were tape stripped at the beginning of the  
903 experiment (TEWL~20 g/m<sup>2</sup>/h) and OVA was applied daily for 7 days. At the end of final  
904 treatment, mice were tape-stripped (TEWL~40 g/m<sup>2</sup>/h) and barrier recovery was assessed. **(B)**  
905 TEWL readings were taken at indicated time points in **(i)** mice pre-colonized with Flowers' Flora  
906 and **(ii)** those treated with vehicle (PBS).

907

## 908 **ACKNOWLEDGEMENTS**

909 We thank Dr. Alex Horswill (University of Colorado) for the kind gift of the *S. aureus* strain; Dr.  
910 Jorge Henao-Mejia (University of Pennsylvania) for the kind gift of  $Ahr^{ff}$  mice; Dr. John Seykora  
911 (University of Pennsylvania) for the kind gift of HaCaT keratinocytes; Dmytro Kobuley,  
912 Gnotobiotic Mouse Facility (University of Pennsylvania) and current and former members of the  
913 Grice lab and the Department of Dermatology for critical discussion and review of the work.

## 914 **FUNDING**

915 This work was funded by grants from the National Institutes of Health, National Institute of  
916 Environmental and Health Sciences (R56-ES-030218 to EAG/TRS, R01-ES-017014 to TRS),  
917 National Institute of Arthritis, Musculoskeletal, and Skin Diseases (R01-AR-006663 and R00-  
918 AR-060873 to EAG), the Burroughs Wellcome Fund PATH Award (EAG), the Linda Pechenik  
919 Montague Investigator Award (EAG), and the Dermatology Foundation Sun Pharma Research  
920 Award (EAG). This research was also supported by the Resource Cores of the Penn Skin

921 Biology and Disease Resource-based Center funded by P30-AR-069589 (*PI: George*  
922 *Cotsarelis, M.D.*). CBM and LF were supported by the Penn Dermatology Research Training  
923 Grant, T32-AR-007465, from the National Institute of Arthritis, Musculoskeletal, and Skin  
924 Diseases.

## 925 REFERENCES

926

- 927 1. Flowers, L. and E.A. Grice, *The Skin Microbiota: Balancing Risk and Reward*.  
928 Cell Host Microbe, 2020. **28**(2): p. 190-200.
- 929 2. Byrd, A.L., Y. Belkaid, and J.A. Segre, *The human skin microbiome*. Nat Rev  
930 Microbiol, 2018. **16**(3): p. 143-155.
- 931 3. Grice, E.A. and J.A. Segre, *The skin microbiome*. Nat Rev Microbiol, 2011. **9**(4):  
932 p. 244-53.
- 933 4. Eyerich, S., et al., *Cutaneous Barriers and Skin Immunity: Differentiating A*  
934 *Connected Network*. Trends Immunol, 2018. **39**(4): p. 315-327.
- 935 5. Parlet, C.P., M.M. Brown, and A.R. Horswill, *Commensal Staphylococci Influence*  
936 *Staphylococcus aureus Skin Colonization and Disease*. Trends Microbiol, 2019.  
937 **27**(6): p. 497-507.
- 938 6. Belkaid, Y. and J.A. Segre, *Dialogue between skin microbiota and immunity*.  
939 Science, 2014. **346**(6212): p. 954-9.
- 940 7. Leech, J.M., et al., *Toxin-Triggered Interleukin-1 Receptor Signaling Enables*  
941 *Early-Life Discrimination of Pathogenic versus Commensal Skin Bacteria*. Cell  
942 Host Microbe, 2019. **26**(6): p. 795-809 e5.
- 943 8. Elias, P.M., *The skin barrier as an innate immune element*. Semin Immunopathol,  
944 2007. **29**(1): p. 3-14.
- 945 9. Schmid-Wendtner, M.H. and H.C. Korting, *The pH of the skin surface and its*  
946 *impact on the barrier function*. Skin Pharmacol Physiol, 2006. **19**(6): p. 296-302.
- 947 10. Meisel, J.S., et al., *Commensal microbiota modulate gene expression in the skin*.  
948 Microbiome, 2018. **6**(1): p. 20.
- 949 11. Simpson, C.L., D.M. Patel, and K.J. Green, *Deconstructing the skin:*  
950 *cytoarchitectural determinants of epidermal morphogenesis*. Nat Rev Mol Cell  
951 Biol, 2011. **12**(9): p. 565-80.
- 952 12. Egawa, G. and K. Kabashima, *Multifactorial skin barrier deficiency and atopic*  
953 *dermatitis: Essential topics to prevent the atopic march*. J Allergy Clin Immunol,  
954 2016. **138**(2): p. 350-358 e1.
- 955 13. Mackowiak, B., et al., *The Roles of Xenobiotic Receptors: Beyond Chemical*  
956 *Disposition*. Drug Metab Dispos, 2018. **46**(9): p. 1361-1371.
- 957 14. Nestle, F.O., et al., *Skin immune sentinels in health and disease*. Nat Rev  
958 Immunol, 2009. **9**(10): p. 679-91.
- 959 15. Kazem, S., E.C. Linssen, and S. Gibbs, *Skin metabolism phase I and phase II*  
960 *enzymes in native and reconstructed human skin: a short review*. Drug Discov  
961 Today, 2019. **24**(9): p. 1899-1910.

- 962 16. Donia, M.S. and M.A. Fischbach, *HUMAN MICROBIOTA. Small molecules from*  
963 *the human microbiota*. Science, 2015. **349**(6246): p. 1254766.
- 964 17. Burbach, K.M., A. Poland, and C.A. Bradfield, *Cloning of the Ah-receptor cDNA*  
965 *reveals a distinctive ligand-activated transcription factor*. Proc Natl Acad Sci U S  
966 A, 1992. **89**(17): p. 8185-9.
- 967 18. Esser, C., et al., *Functions of the aryl hydrocarbon receptor in the skin*. Semin  
968 Immunopathol, 2013. **35**(6): p. 677-91.
- 969 19. Furue, M., et al., *Role of AhR/ARNT system in skin homeostasis*. Arch Dermatol  
970 Res, 2014. **306**(9): p. 769-79.
- 971 20. Sutter, C.H., et al., *2,3,7,8-Tetrachlorodibenzo-p-dioxin increases the expression*  
972 *of genes in the human epidermal differentiation complex and accelerates*  
973 *epidermal barrier formation*. Toxicol Sci, 2011. **124**(1): p. 128-37.
- 974 21. Sutter, C.H., et al., *EGF receptor signaling blocks aryl hydrocarbon receptor-*  
975 *mediated transcription and cell differentiation in human epidermal keratinocytes*.  
976 Proc Natl Acad Sci U S A, 2009. **106**(11): p. 4266-71.
- 977 22. Kennedy, L.H., et al., *2,3,7,8-Tetrachlorodibenzo-p-dioxin-mediated production of*  
978 *reactive oxygen species is an essential step in the mechanism of action to*  
979 *accelerate human keratinocyte differentiation*. Toxicol Sci, 2013. **132**(1): p. 235-  
980 49.
- 981 23. Stevens, E.A., J.D. Mezrich, and C.A. Bradfield, *The aryl hydrocarbon receptor: a*  
982 *perspective on potential roles in the immune system*. Immunology, 2009. **127**(3):  
983 p. 299-311.
- 984 24. Nguyen, L.P. and C.A. Bradfield, *The search for endogenous activators of the*  
985 *aryl hydrocarbon receptor*. Chem Res Toxicol, 2008. **21**(1): p. 102-16.
- 986 25. McIntosh, B.E., J.B. Hogenesch, and C.A. Bradfield, *Mammalian Per-Arnt-Sim*  
987 *proteins in environmental adaptation*. Annu Rev Physiol, 2010. **72**: p. 625-45.
- 988 26. Esser, C., *The Aryl Hydrocarbon Receptor in Immunity: Tools and Potential*.  
989 Methods Mol Biol, 2016. **1371**: p. 239-57.
- 990 27. Kubo, A., K. Nagao, and M. Amagai, *Epidermal barrier dysfunction and*  
991 *cutaneous sensitization in atopic diseases*. J Clin Invest, 2012. **122**(2): p. 440-7.
- 992 28. Roberson, E.D. and A.M. Bowcock, *Psoriasis genetics: breaking the barrier*.  
993 Trends Genet, 2010. **26**(9): p. 415-23.
- 994 29. Elias, P.M., *Primary role of barrier dysfunction in the pathogenesis of atopic*  
995 *dermatitis*. Exp Dermatol, 2018. **27**(8): p. 847-851.
- 996 30. Spergel, J.M., et al., *Epicutaneous sensitization with protein antigen induces*  
997 *localized allergic dermatitis and hyperresponsiveness to methacholine after*  
998 *single exposure to aerosolized antigen in mice*. J Clin Invest, 1998. **101**(8): p.  
999 1614-22.
- 1000 31. Yockey, L.J., et al., *The absence of a microbiota enhances TSLP expression in*  
1001 *mice with defective skin barrier but does not affect the severity of their allergic*  
1002 *inflammation*. J Invest Dermatol, 2013. **133**(12): p. 2714-2721.
- 1003 32. Jensen, J.M., et al., *Impaired cutaneous permeability barrier function, skin*  
1004 *hydration, and sphingomyelinase activity in keratin 10 deficient mice*. J Invest  
1005 Dermatol, 2000. **115**(4): p. 708-13.

- 1006 33. Schmuth, M., et al., *Structural and functional consequences of loricrin mutations*  
1007 *in human loricrin keratoderma (Vohwinkel syndrome with ichthyosis)*. J Invest  
1008 Dermatol, 2004. **122**(4): p. 909-22.
- 1009 34. Chamcheu, J.C., et al., *Keratin gene mutations in disorders of human skin and its*  
1010 *appendages*. Arch Biochem Biophys, 2011. **508**(2): p. 123-37.
- 1011 35. Brandner, J.M., et al., *Epidermal tight junctions in health and disease*. Tissue  
1012 Barriers, 2015. **3**(1-2): p. e974451.
- 1013 36. Broussard, J.A., J.L. Koetsier, and K.J. Green, *Desmosomes pattern cell*  
1014 *mechanics to govern epidermal tissue form and function*. bioRxiv, 2020: p.  
1015 2020.01.21.914176.
- 1016 37. Samuelov, L., et al., *Desmoglein 1 deficiency results in severe dermatitis,*  
1017 *multiple allergies and metabolic wasting*. Nat Genet, 2013. **45**(10): p. 1244-1248.
- 1018 38. Elias, P.M., et al., *Desmoglein isoform distribution affects stratum corneum*  
1019 *structure and function*. J Cell Biol, 2001. **153**(2): p. 243-9.
- 1020 39. Grubauer, G., P.M. Elias, and K.R. Feingold, *Transepidermal water loss: the*  
1021 *signal for recovery of barrier structure and function*. J Lipid Res, 1989. **30**(3): p.  
1022 323-33.
- 1023 40. Fluhr, J.W., K.R. Feingold, and P.M. Elias, *Transepidermal water loss reflects*  
1024 *permeability barrier status: validation in human and rodent in vivo and ex vivo*  
1025 *models*. Exp Dermatol, 2006. **15**(7): p. 483-92.
- 1026 41. Tellkamp, F., S. Vorhagen, and C.M. Niessen, *Epidermal polarity genes in health*  
1027 *and disease*. Cold Spring Harb Perspect Med, 2014. **4**(12): p. a015255.
- 1028 42. Hennings, H., et al., *Calcium regulation of growth and differentiation of mouse*  
1029 *epidermal cells in culture*. Cell, 1980. **19**(1): p. 245-54.
- 1030 43. Naik, S., et al., *Compartmentalized control of skin immunity by resident*  
1031 *commensals*. Science, 2012. **337**(6098): p. 1115-9.
- 1032 44. Bowen, A.C., et al., *Sulfamethoxazole-Trimethoprim (Cotrimoxazole) for Skin and*  
1033 *Soft Tissue Infections Including Impetigo, Cellulitis, and Abscess*. Open Forum  
1034 Infect Dis, 2017. **4**(4): p. ofx232.
- 1035 45. Lofmark, S., C. Edlund, and C.E. Nord, *Metronidazole is still the drug of choice*  
1036 *for treatment of anaerobic infections*. Clin Infect Dis, 2010. **50** **Suppl 1**: p. S16-  
1037 23.
- 1038 46. Beco, L., et al., *Suggested guidelines for using systemic antimicrobials in*  
1039 *bacterial skin infections: part 2-- antimicrobial choice, treatment regimens and*  
1040 *compliance*. Vet Rec, 2013. **172**(6): p. 156-60.
- 1041 47. Derrick, C.W., Jr. and K. Reilly, *The role of cephalexin in the treatment of skin*  
1042 *and soft-tissue infections*. Postgrad Med J, 1983. **59** **Suppl 5**: p. 43-6.
- 1043 48. Nagase, N., et al., *Isolation and species distribution of staphylococci from animal*  
1044 *and human skin*. J Vet Med Sci, 2002. **64**(3): p. 245-50.
- 1045 49. SanMiguel, A.J., et al., *Topical Antimicrobial Treatments Can Elicit Shifts to*  
1046 *Resident Skin Bacterial Communities and Reduce Colonization by*  
1047 *Staphylococcus aureus Competitors*. Antimicrob Agents Chemother, 2017. **61**(9).
- 1048 50. Fu, Z.D., et al., *RNA Sequencing Quantification of Xenobiotic-Processing Genes*  
1049 *in Various Sections of the Intestine in Comparison to the Liver of Male Mice*.  
1050 Drug Metab Dispos, 2016. **44**(6): p. 842-56.

- 1051 51. Minzaghi, D., P. Pavel, and S. Dubrac, *Xenobiotic Receptors and Their Mates in*  
1052 *Atopic Dermatitis*. *Int J Mol Sci*, 2019. **20**(17).
- 1053 52. Wright, E.J., et al., *Canonical and non-canonical aryl hydrocarbon receptor*  
1054 *signaling pathways*. *Curr Opin Toxicol*, 2017. **2**: p. 87-92.
- 1055 53. Larigot, L., et al., *AhR signaling pathways and regulatory functions*. *Biochim*  
1056 *Open*, 2018. **7**: p. 1-9.
- 1057 54. Ehrlich, A.K., et al., *TCDD, FICZ, and Other High Affinity AhR Ligands Dose-*  
1058 *Dependently Determine the Fate of CD4+ T Cell Differentiation*. *Toxicol Sci*,  
1059 2018. **161**(2): p. 310-320.
- 1060 55. Fritsche, E., et al., *Lightening up the UV response by identification of the*  
1061 *arylhydrocarbon receptor as a cytoplasmatic target for ultraviolet B radiation*.  
1062 *Proc Natl Acad Sci U S A*, 2007. **104**(21): p. 8851-6.
- 1063 56. Syed, D.N. and H. Mukhtar, *FICZ: A Messenger of Light in Human Skin*. *J Invest*  
1064 *Dermatol*, 2015. **135**(6): p. 1478-1481.
- 1065 57. van den Bogaard, E.H., et al., *Genetic and pharmacological analysis identifies a*  
1066 *physiological role for the AHR in epidermal differentiation*. *J Invest Dermatol*,  
1067 2015. **135**(5): p. 1320-1328.
- 1068 58. Haas, K., et al., *Aryl Hydrocarbon Receptor in Keratinocytes Is Essential for*  
1069 *Murine Skin Barrier Integrity*. *J Invest Dermatol*, 2016. **136**(11): p. 2260-2269.
- 1070 59. Alexander, H., et al., *The role of bacterial skin infections in atopic dermatitis:*  
1071 *expert statement and review from the International Eczema Council Skin*  
1072 *Infection Group*. *Br J Dermatol*, 2020. **182**(6): p. 1331-1342.
- 1073 60. Miller, R.J., et al., *Development of a Staphylococcus aureus reporter strain with*  
1074 *click beetle red luciferase for enhanced in vivo imaging of experimental*  
1075 *bacteremia and mixed infections*. *Sci Rep*, 2019. **9**(1): p. 16663.
- 1076 61. Cork, M.J., et al., *Epidermal barrier dysfunction in atopic dermatitis*. *J Invest*  
1077 *Dermatol*, 2009. **129**(8): p. 1892-908.
- 1078 62. Rooks, M.G. and W.S. Garrett, *Gut microbiota, metabolites and host immunity*.  
1079 *Nat Rev Immunol*, 2016. **16**(6): p. 341-52.
- 1080 63. Singh, R., et al., *Enhancement of the gut barrier integrity by a microbial*  
1081 *metabolite through the Nrf2 pathway*. *Nat Commun*, 2019. **10**(1): p. 89.
- 1082 64. Wikramanayake, T.C., O. Stojadinovic, and M. Tomic-Canic, *Epidermal*  
1083 *Differentiation in Barrier Maintenance and Wound Healing*. *Adv Wound Care*  
1084 (New Rochelle), 2014. **3**(3): p. 272-280.
- 1085 65. Matsui, T. and M. Amagai, *Dissecting the formation, structure and barrier*  
1086 *function of the stratum corneum*. *Int Immunol*, 2015. **27**(6): p. 269-80.
- 1087 66. Kaiko, G.E., et al., *The Colonic Crypt Protects Stem Cells from Microbiota-*  
1088 *Derived Metabolites*. *Cell*, 2016. **165**(7): p. 1708-1720.
- 1089 67. Johansson, M.E., et al., *Normalization of Host Intestinal Mucus Layers Requires*  
1090 *Long-Term Microbial Colonization*. *Cell Host Microbe*, 2015. **18**(5): p. 582-92.
- 1091 68. Hong, C.H., et al., *Selective AhR knockout in langerin-expressing cells abates*  
1092 *Langerhans cells and polarizes Th2/Tr1 in epicutaneous protein sensitization*.  
1093 *Proc Natl Acad Sci U S A*, 2020. **117**(23): p. 12980-12990.
- 1094 69. Constantinides, M.G., et al., *MAIT cells are imprinted by the microbiota in early*  
1095 *life and promote tissue repair*. *Science*, 2019. **366**(6464).



- 1096 70. van den Bogaard, E.H., et al., *Coal tar induces AHR-dependent skin barrier*  
1097 *repair in atopic dermatitis*. J Clin Invest, 2013. **123**(2): p. 917-27.
- 1098 71. Smith, S.H., et al., *Tapinarof Is a Natural AhR Agonist that Resolves Skin*  
1099 *Inflammation in Mice and Humans*. J Invest Dermatol, 2017. **137**(10): p. 2110-  
1100 2119.
- 1101 72. Tauchi, M., et al., *Constitutive expression of aryl hydrocarbon receptor in*  
1102 *keratinocytes causes inflammatory skin lesions*. Mol Cell Biol, 2005. **25**(21): p.  
1103 9360-8.
- 1104 73. Hidaka, T., et al., *The aryl hydrocarbon receptor AhR links atopic dermatitis and*  
1105 *air pollution via induction of the neurotrophic factor artemin*. Nat Immunol, 2017.  
1106 **18**(1): p. 64-73.
- 1107 74. Moura-Alves, P., et al., *AhR sensing of bacterial pigments regulates antibacterial*  
1108 *defence*. Nature, 2014. **512**(7515): p. 387-92.
- 1109 75. Harris, T.A., et al., *Resistin-like Molecule alpha Provides Vitamin-A-Dependent*  
1110 *Antimicrobial Protection in the Skin*. Cell Host Microbe, 2019. **25**(6): p. 777-788  
1111 e8.
- 1112 76. Murphy, K.A., L. Quadro, and L.A. White, *The intersection between the aryl*  
1113 *hydrocarbon receptor (AhR)- and retinoic acid-signaling pathways*. Vitam Horm,  
1114 2007. **75**: p. 33-67.
- 1115 77. Andreola, F., et al., *Aryl hydrocarbon receptor knockout mice (AHR<sup>-/-</sup>) exhibit*  
1116 *liver retinoid accumulation and reduced retinoic acid metabolism*. Cancer Res,  
1117 1997. **57**(14): p. 2835-8.
- 1118 78. Mombaerts, P., et al., *RAG-1-deficient mice have no mature B and T*  
1119 *lymphocytes*. Cell, 1992. **68**(5): p. 869-77.
- 1120 79. Walisser, J.A., et al., *Aryl hydrocarbon receptor-dependent liver development*  
1121 *and hepatotoxicity are mediated by different cell types*. Proc Natl Acad Sci U S A,  
1122 2005. **102**(49): p. 17858-63.
- 1123 80. Dassule, H.R., et al., *Sonic hedgehog regulates growth and morphogenesis of*  
1124 *the tooth*. Development, 2000. **127**(22): p. 4775-85.
- 1125 81. Lichti, U., J. Anders, and S.H. Yuspa, *Isolation and short-term culture of primary*  
1126 *keratinocytes, hair follicle populations and dermal cells from newborn mice and*  
1127 *keratinocytes from adult mice for in vitro analysis and for grafting to*  
1128 *immunodeficient mice*. Nat Protoc, 2008. **3**(5): p. 799-810.
- 1129 82. Chapman, S., et al., *The effect of Rho kinase inhibition on long-term keratinocyte*  
1130 *proliferation is rapid and conditional*. Stem Cell Res Ther, 2014. **5**(2): p. 60.
- 1131 83. Boukamp, P., et al., *Normal keratinization in a spontaneously immortalized*  
1132 *aneuploid human keratinocyte cell line*. J Cell Biol, 1988. **106**(3): p. 761-71.
- 1133 84. Zheng, Q. and E.A. Grice, *AlignerBoost: A Generalized Software Toolkit for*  
1134 *Boosting Next-Gen Sequencing Mapping Accuracy Using a Bayesian-Based*  
1135 *Mapping Quality Framework*. PLoS Comput Biol, 2016. **12**(10): p. e1005096.
- 1136 85. Dobin, A., et al., *STAR: ultrafast universal RNA-seq aligner*. Bioinformatics, 2013.  
1137 **29**(1): p. 15-21.
- 1138 86. Love, M.I., W. Huber, and S. Anders, *Moderated estimation of fold change and*  
1139 *dispersion for RNA-seq data with DESeq2*. Genome Biol, 2014. **15**(12): p. 550.

- 1140 87. Durinck, S., et al., *Mapping identifiers for the integration of genomic datasets with*  
1141 *the R/Bioconductor package biomaRt*. Nature Protocols, 2009. **4**(8): p. 1184-  
1142 1191.
- 1143 88. Benjamini, Y. and D. Yekutieli, *The control of the false discovery rate in multiple*  
1144 *testing under dependency*. Annals of Statistics, 2001. **29**(4): p. 1165-1188.
- 1145 89. Supek, F., et al., *REVIGO Summarizes and Visualizes Long Lists of Gene*  
1146 *Ontology Terms*. Plos One, 2011. **6**(7).
- 1147 90. Meisel, J.S., et al., *Skin Microbiome Surveys Are Strongly Influenced by*  
1148 *Experimental Design*. J Invest Dermatol, 2016. **136**(5): p. 947-956.
- 1149 91. Zheng, Q., et al., *HmmUFOtu: An HMM and phylogenetic placement based ultra-*  
1150 *fast taxonomic assignment and OTU picking tool for microbiome amplicon*  
1151 *sequencing studies*. Genome Biol, 2018. **19**(1): p. 82.
- 1152 92. McMurdie, P.J. and S. Holmes, *phyloseq: an R package for reproducible*  
1153 *interactive analysis and graphics of microbiome census data*. PLoS One, 2013.  
1154 **8**(4): p. e61217.
- 1155 93. Man, G., et al., *Topical hesperidin enhances epidermal function in an aged*  
1156 *murine model*. J Invest Dermatol, 2015. **135**(4): p. 1184-1187.
- 1157 94. Bradley, C.W., et al., *Longitudinal Evaluation of the Skin Microbiome and*  
1158 *Association with Microenvironment and Treatment in Canine Atopic Dermatitis*. J  
1159 Invest Dermatol, 2016. **136**(6): p. 1182-1190.
- 1160 95. Simpson, C.L., et al., *Plakoglobin rescues adhesive defects induced by*  
1161 *ectodomain truncation of the desmosomal cadherin desmoglein 1: implications*  
1162 *for exfoliative toxin-mediated skin blistering*. Am J Pathol, 2010. **177**(6): p. 2921-  
1163 37.
- 1164 96. Uberoi, A. *Standard protocol for performing immunofluorescence or*  
1165 *immunohistochemistry on paraffin embedded tissue*. 2017.
- 1166 97. Crumrine, D., et al., *Mutations in Recessive Congenital Ichthyoses Illuminate the*  
1167 *Origin and Functions of the Corneocyte Lipid Envelope*. J Invest Dermatol, 2019.  
1168 **139**(4): p. 760-768.
- 1169 98. Eggers, C.H., B.; Lewis, S.; Strayer, C.; Landreman, A. *Designing a*  
1170 *Bioluminescent Reporter Assay: Normalization Options*. 2016; Available from:  
1171 [https://www.promega.com/resources/pubhub/bioluminescent-reporter-assay-](https://www.promega.com/resources/pubhub/bioluminescent-reporter-assay-normalization/)  
1172 [normalization/](https://www.promega.com/resources/pubhub/bioluminescent-reporter-assay-normalization/).
- 1173 99. Wanke, I., et al., *Staphylococcus aureus skin colonization is promoted by barrier*  
1174 *disruption and leads to local inflammation*. Exp Dermatol, 2013. **22**(2): p. 153-5.
- 1175 100. Jin, H., et al., *Animal models of atopic dermatitis*. J Invest Dermatol, 2009.  
1176 **129**(1): p. 31-40.
- 1177 101. Nakatsuji, T., et al., *Staphylococcus aureus Exploits Epidermal Barrier Defects in*  
1178 *Atopic Dermatitis to Trigger Cytokine Expression*. J Invest Dermatol, 2016.  
1179 **136**(11): p. 2192-2200.
- 1180 102. Wickham, H. *ggplot2: Elegant Graphics for Data Analysis*.  
1181  
1182 . 2016; Available from: <https://ggplot2.tidyverse.org>.
- 1183 103. Taylor, S.C., et al., *The Ultimate qPCR Experiment: Producing Publication*  
1184 *Quality, Reproducible Data the First Time*. Trends Biotechnol, 2019. **37**(7): p.  
1185 761-774.  
1186

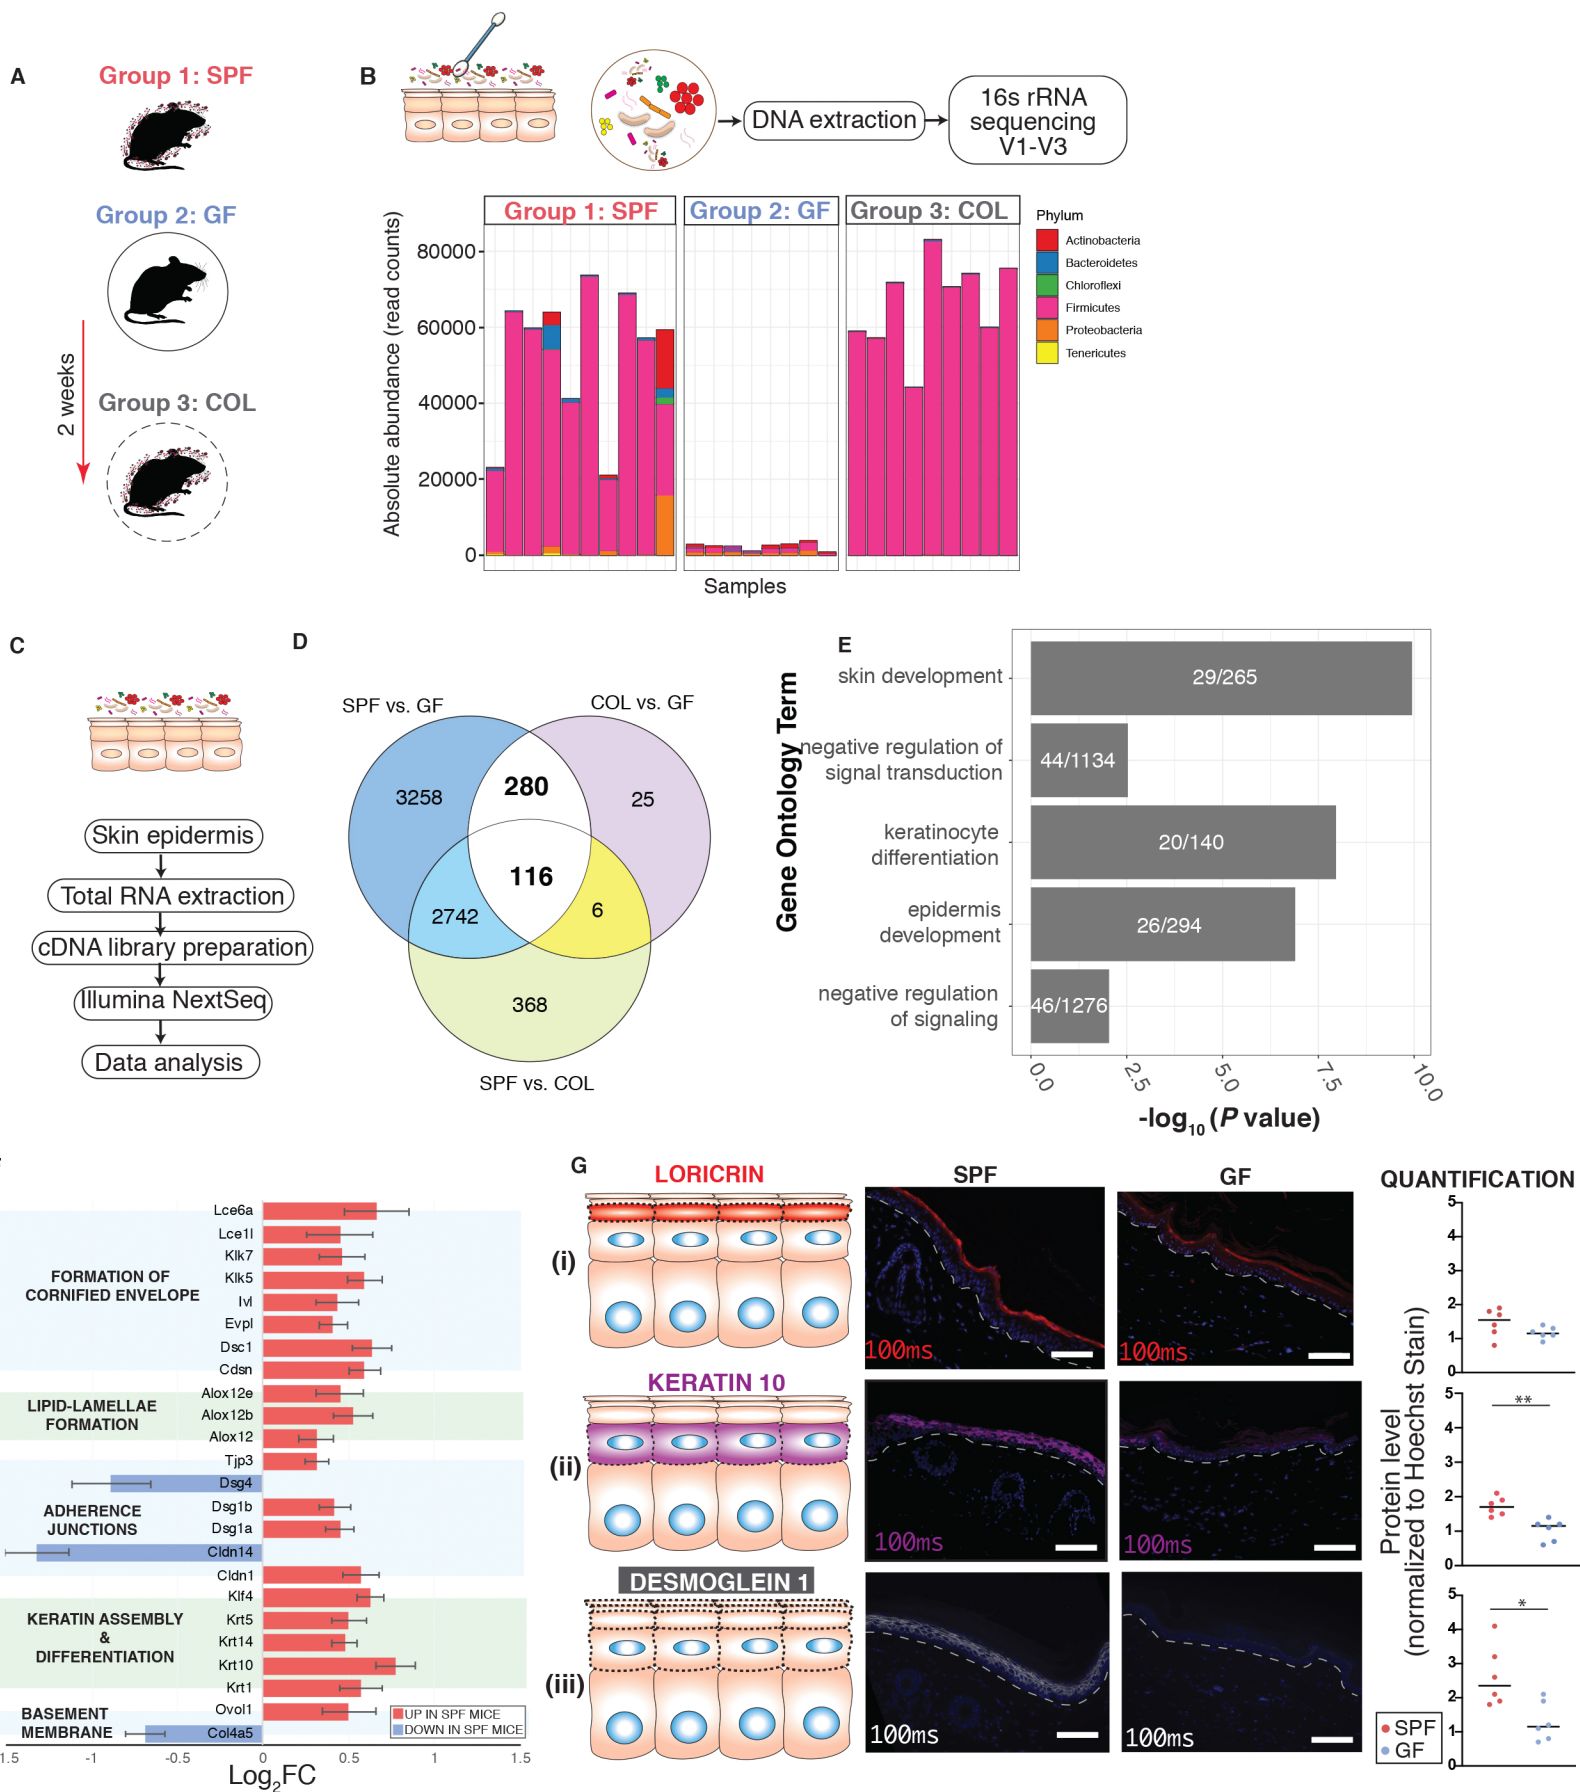

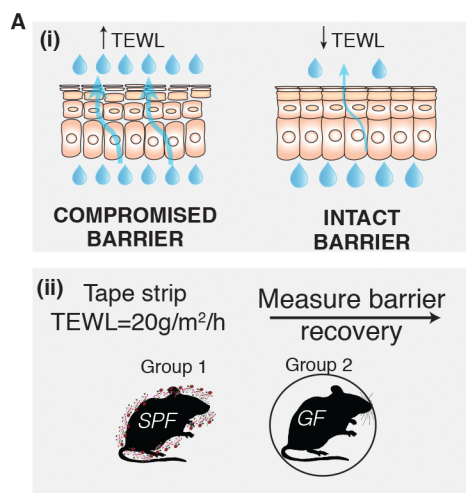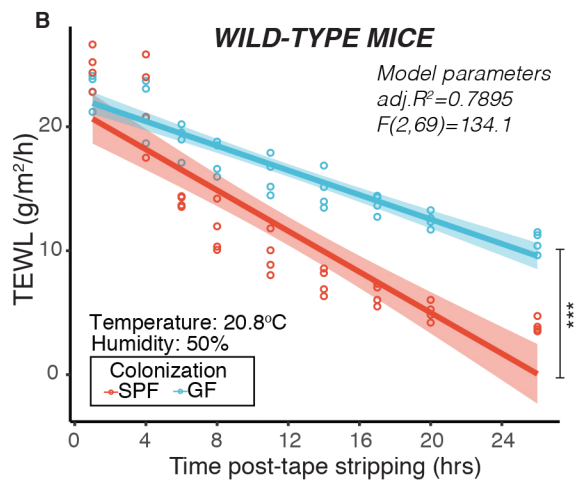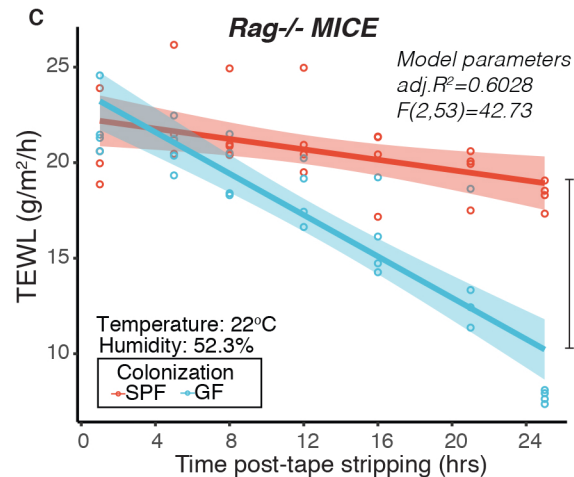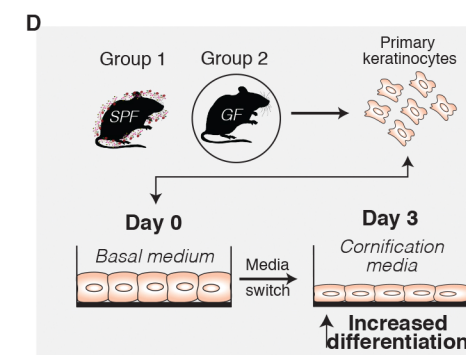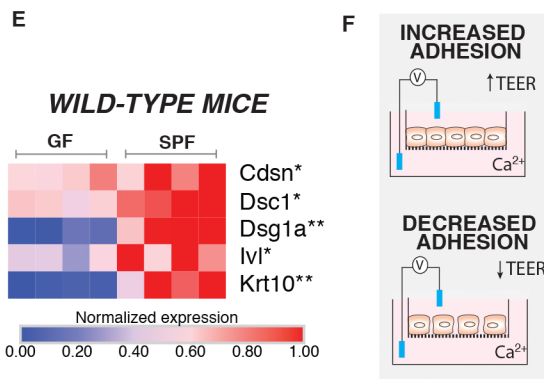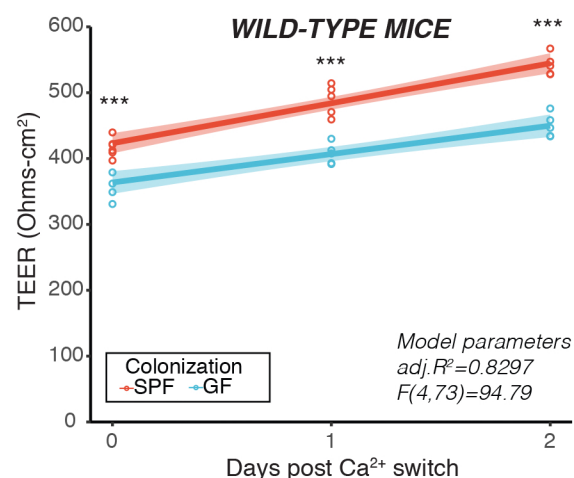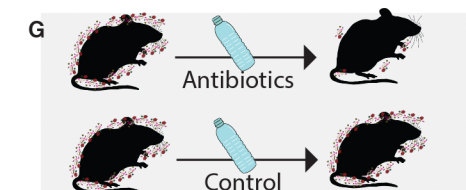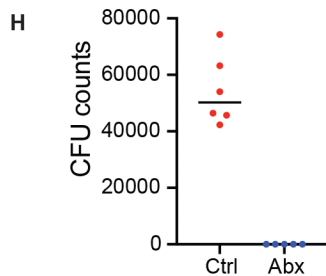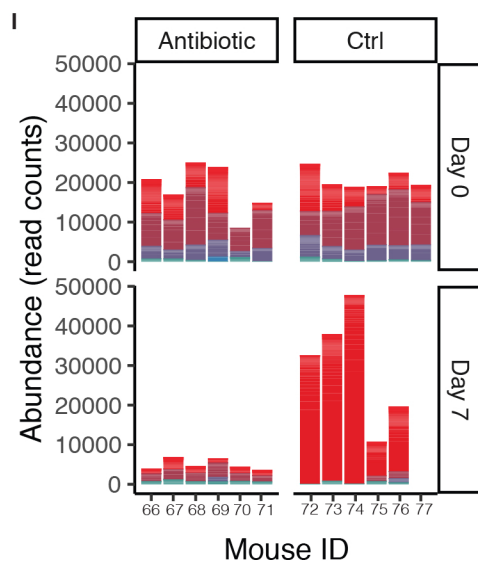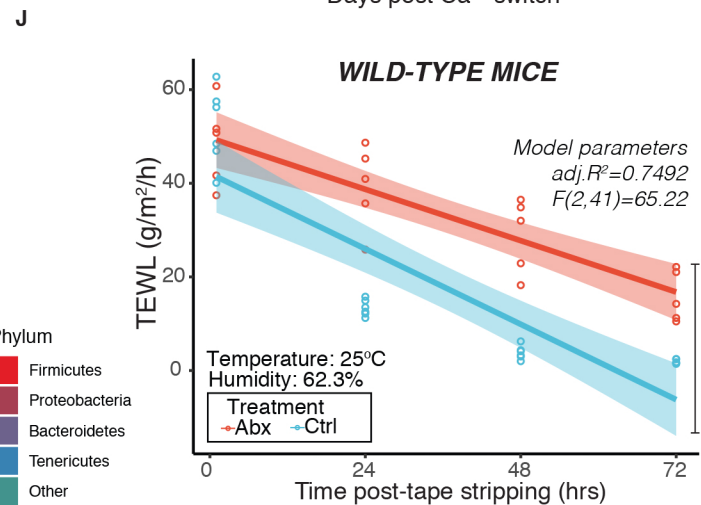

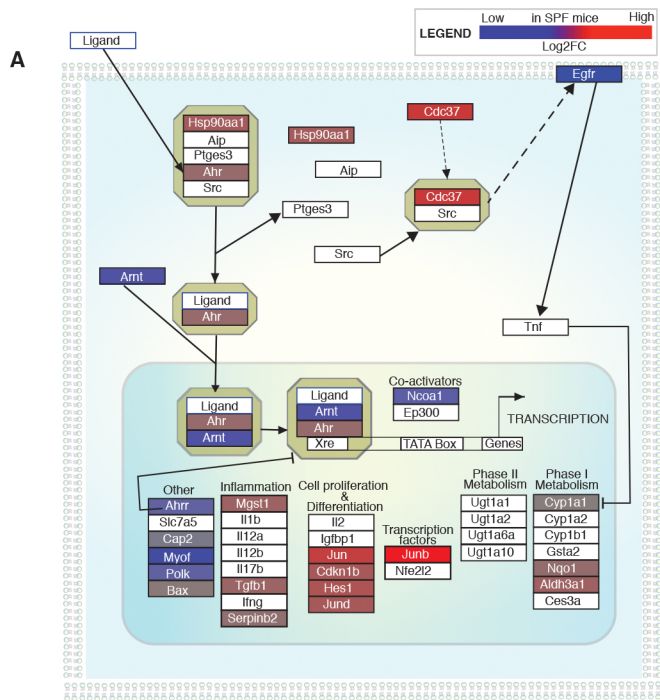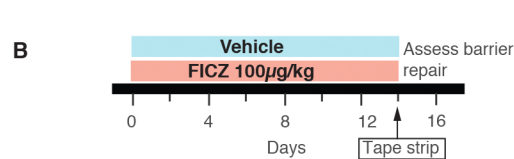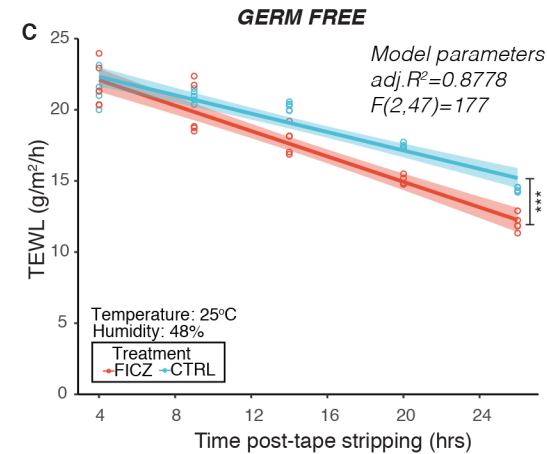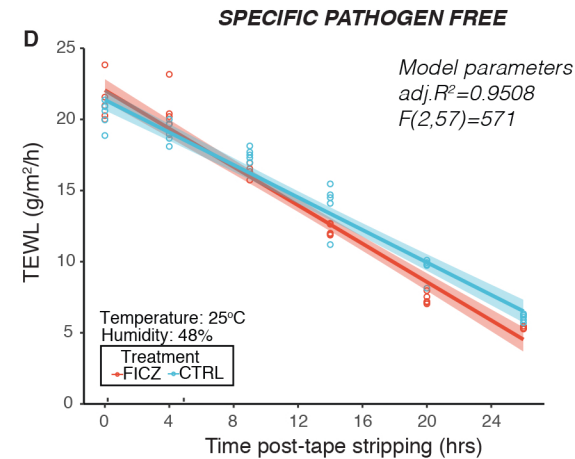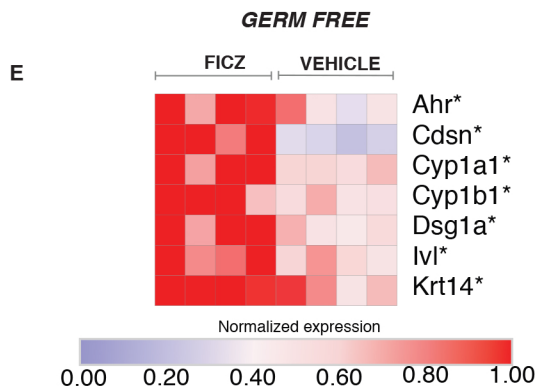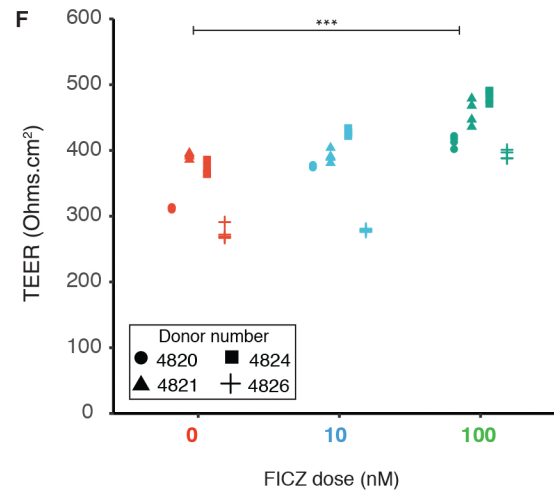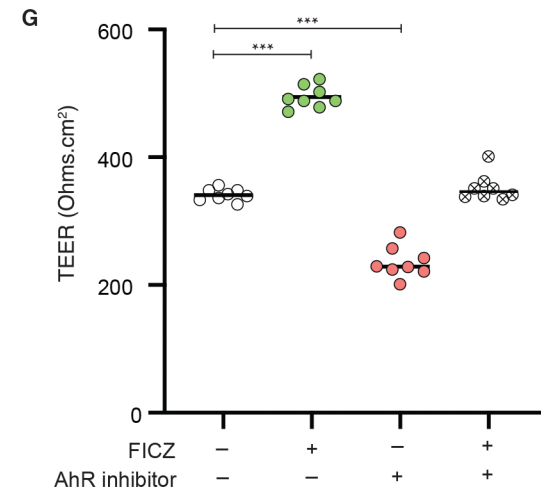

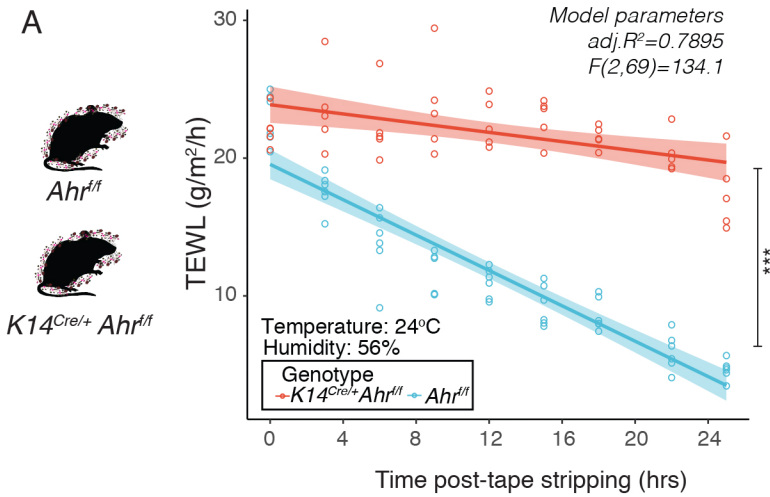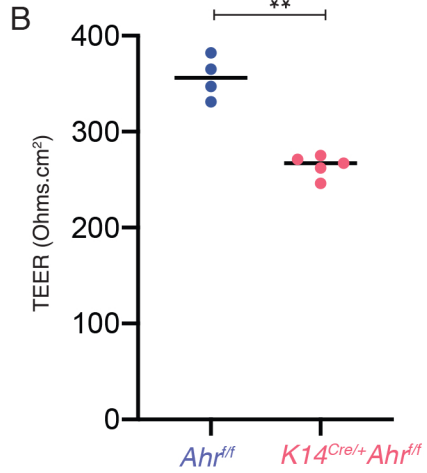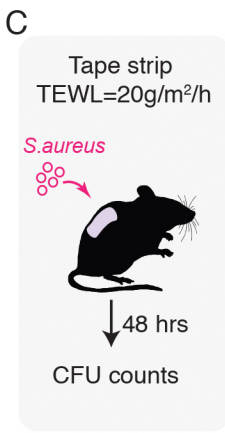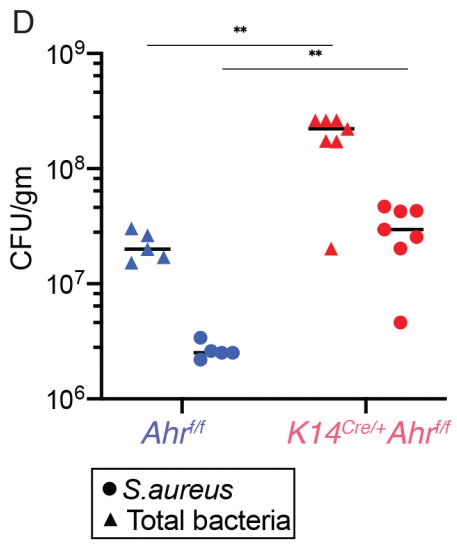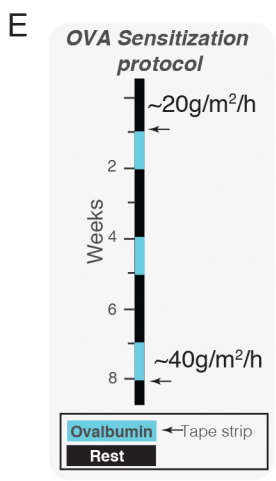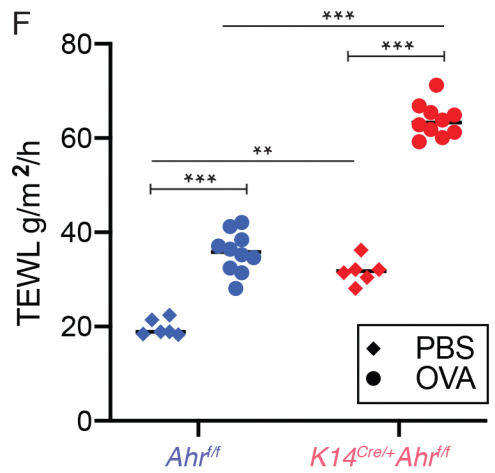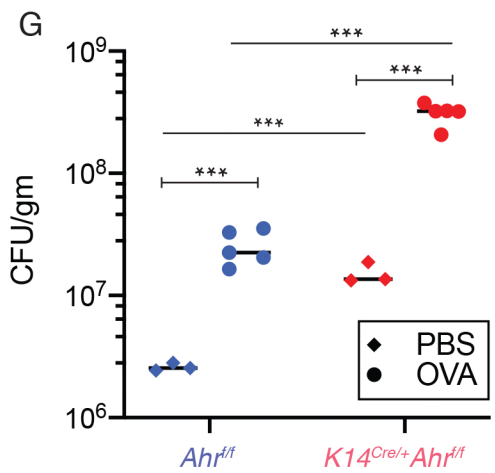

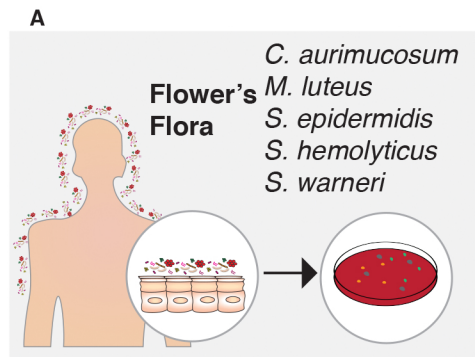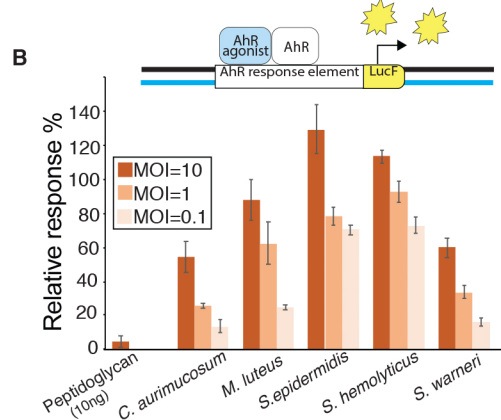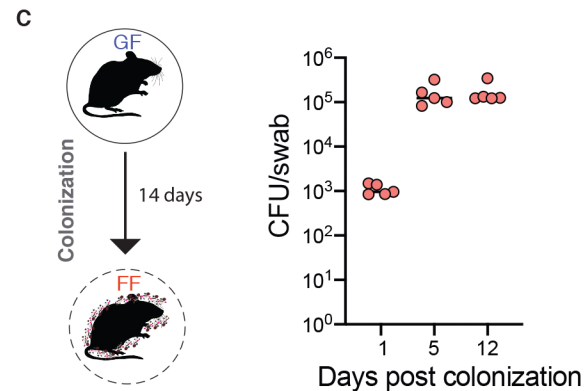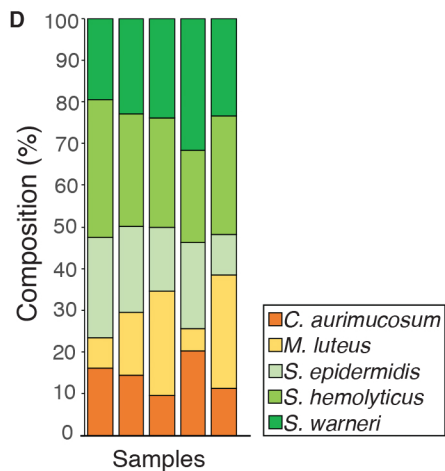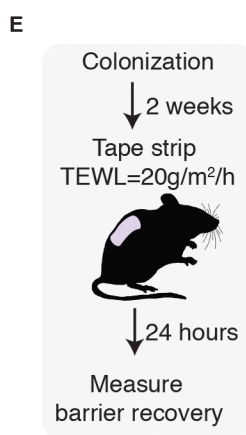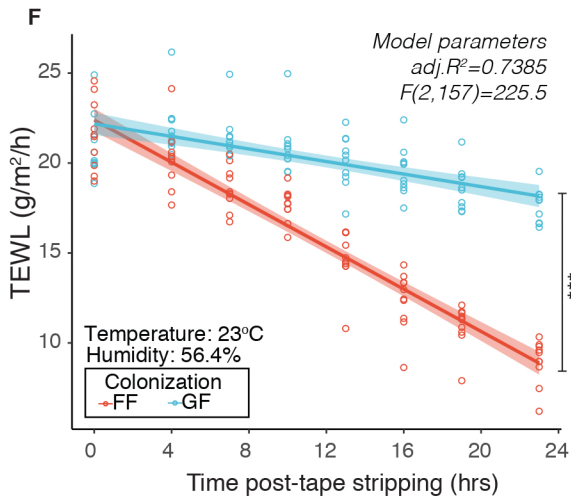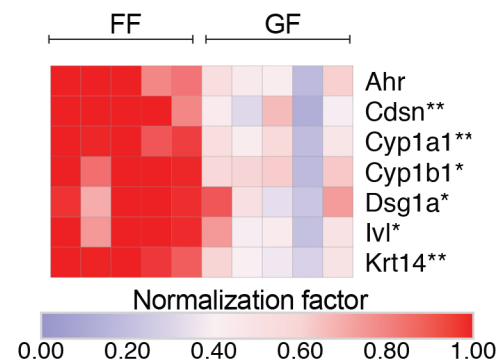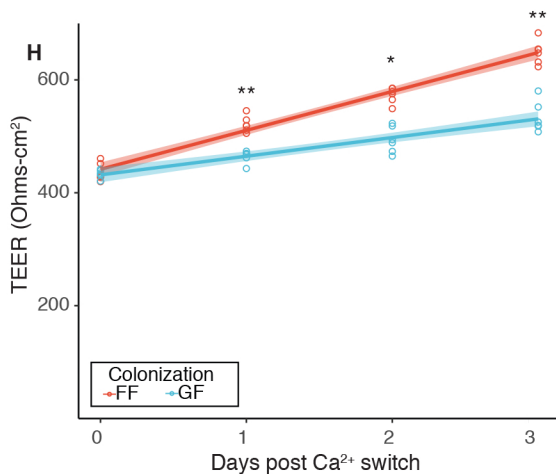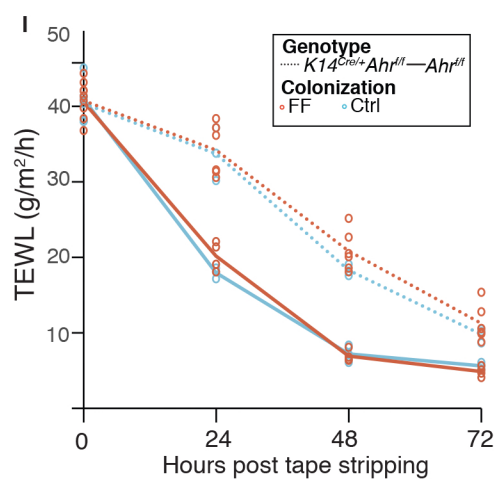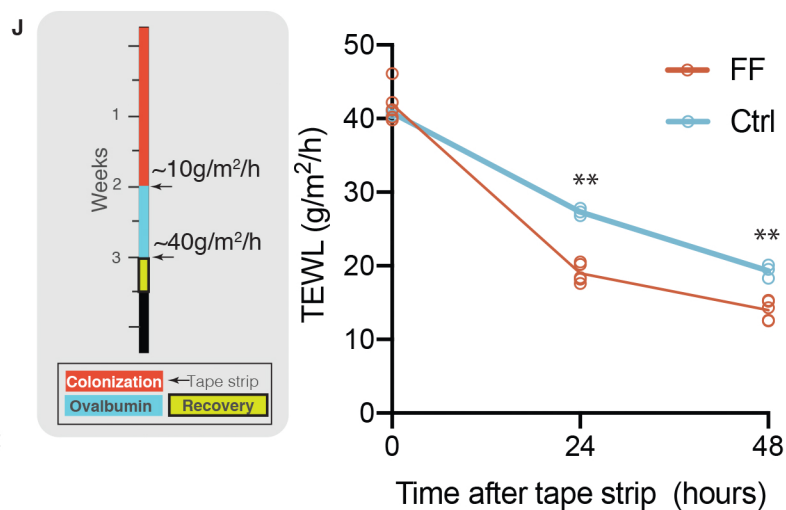

Source: https://www.biorxiv.org/content/biorxiv/early/2020/12/06/2020.12.05.413096.full.pdf
